# Supplementary material for: The azide–alkyne cycloaddition catalysed by transition metal oxide nanoparticles
Source: Royal Society of Chemistry journal article supplement (doi:10.1039/c9nj04690a), 2019-01-01
Supplement: c9nj04690a1.pdf [file c9nj04690a1.pdf]

## Electronic supplementary information

### The azide-alkyne cycloaddition catalysed by transition metal oxide nanoparticles

Giorgio Molteni, Anna M. Ferretti, Mario Italo Trioni, Fausto Cargnoni, Alessandro Ponti

### Summary

|                                                                                                                                                                                                                              |    |
|------------------------------------------------------------------------------------------------------------------------------------------------------------------------------------------------------------------------------|----|
| General remarks .....                                                                                                                                                                                                        | 2  |
| Wide field TEM images .....                                                                                                                                                                                                  | 4  |
| Distribution of the nanoparticle diameters .....                                                                                                                                                                             | 8  |
| Determination of Mn concentration in MnO and $\alpha$ -MnS nanoparticle dispersions .....                                                                                                                                    | 9  |
| Calculation of the ligand density from elemental analysis.....                                                                                                                                                               | 10 |
| Loss of nanoparticles during recycle.....                                                                                                                                                                                    | 12 |
| Physical data of compounds <b>4a</b> , <b>5a</b> , <b>4b</b> , <b>5b</b> , <b>4c</b> , <b>5c</b> , and <b>6</b> .....                                                                                                        | 13 |
| <sup>1</sup> H- and <sup>13</sup> C-NMR spectra of compounds <b>4a</b> , <b>5a</b> , <b>4b</b> , <b>5b</b> , <b>4c</b> , <b>5c</b> , and <b>6</b> .....                                                                      | 15 |
| Electron density corresponding to relevant molecular orbitals of <b>1c</b> and <b>2</b> from periodic DFT calculations.....                                                                                                  | 22 |
| Electron density of relevant states of <b>1c</b> adsorbed on the (001) face of magnetite from periodic DFT calculations .....                                                                                                | 23 |
| Geometrical parameters and minimum energy structure of <b>1c</b> and <b>2</b> (OPBE/LANLDZ).....                                                                                                                             | 24 |
| Geometrical parameters and structure of the regioisomeric transition states of the <b>1c</b> + <b>2</b> reaction leading the <b>4</b> and <b>5</b> cycloadducts (OPBE /LANLDZ).....                                          | 26 |
| Geometrical parameters and minimum energy structure of <b>1c</b> -Fe(OH) <sub>3</sub> and <b>1c</b> -Fe <sub>2</sub> (OH) <sub>4</sub> (OPBE/LANL2/LANLDZ) .....                                                             | 28 |
| Geometrical parameters and structure of the regioisomeric transition states of the <b>1c</b> -Fe(OH) <sub>3</sub> + <b>2</b> reaction leading the <b>4</b> and <b>5</b> cycloadducts (OPBE/LANL2/LANLDZ) .....               | 30 |
| Geometrical parameters and structure of the regioisomeric transition states of the <b>1c</b> -Fe <sub>2</sub> (OH) <sub>4</sub> + <b>2</b> reaction leading the <b>4</b> and <b>5</b> cycloadducts (OPBE/LANL2/LANLDZ) ..... | 34 |

## General remarks

Melting points were determined on a Büchi apparatus in open tubes and are uncorrected. FTIR spectra were recorded on a Thermo Nicolet NEXUS 670 FTIR or a Perkin Elmer 1725 X spectrophotometer. Mass spectra were determined on a VG-70EQ apparatus.<sup>1</sup>H NMR (300 MHz) and <sup>13</sup>C NMR (75 MHz) spectra were taken with a Bruker AMX 300 instrument (in CDCl<sub>3</sub> solutions at room temperature unless otherwise stated). Chemical shifts are given as parts per million from tetramethylsilane. Coupling constants (*J*) values are given in hertz and are quoted to ±0.1 Hz consistently with NMR equipment accuracy. Transmission electron microscopy (TEM) images were collected using a Zeiss LIBRA 200FE microscope. The TEM specimens were prepared by evaporating in air a drop of diluted NP dispersion on a carbon coated copper grid. The size distribution of the NPs was obtained by analyzing TEM images by the software Pebbles.<sup>1</sup> The M:Fe atomic ratio of MFe<sub>2</sub>O<sub>4</sub> NPs (M = Mn, Co) was obtained by analyzing electron energy loss spectra (EELS) by a home-built software based on Egerton's SIGMAL3.<sup>2</sup> The iron concentration of the ferrite nanoparticle dispersions was measured by a spectrophotometric method using tiron as an iron complexing agent.<sup>3</sup> The manganese concentration of the dispersions of MnO and MnS nanoparticles was measured as described below.

All reagents were used as supplied from chemical sources as appropriate. Solvents were dried and stored over 4Å molecular sieves prior to use. Reagent chemicals were purchased from Aldrich Chemical Company Ltd. Concentrated HNO<sub>3</sub> and HCl used for nanoparticle digestion were Aldrich Trace Select reagents.

Compounds **4a**,<sup>4</sup> **5a**,<sup>4</sup> **4b**,<sup>5</sup> **5b**,<sup>5</sup> **4c**<sup>6</sup> and **5c**<sup>7</sup> are known in the literature.

- 1 S. Mondini, A. M. Ferretti, A. Puglisi, A. Ponti, *Nanoscale*, **2012**, *4*, 5356-5372. Pebbles is freely available from the authors, <http://pebbles.istm.cnr.it>
- 2 R. F. Egerton, *Electron Energy-Loss Spectroscopy in the Electron Microscope*, 3<sup>rd</sup> ed., Springer, Heidelberg, **2011**.
- 3 S. Mondini, M. Leonzino, C. Drago, A. M. Ferretti, S. Usseglio, D. Maggioni, P. Tornese, B. Chini, A. Ponti, *Langmuir*, **2015**, *31*, 7381-7390.
- 4 A. M. Ferretti, A. Ponti, G. Molteni, *Tetrahedron Lett.*, **2015**, *56*, 5727-5730.

- 5 T. Farooq, L. K. Sydnes, K. W. Törnroos, B. E. Haug, *Synthesis*, **2012**, 2070 –2078.
- 6 R. Huisgen, L. Möbius, G. Szeimies, *Chem. Ber.*, **1965**, 98, 4014 –4021.
- 7 C. Wentrup, V. V. Ramana Rao, W. Frank, B. E. Fulloon, D. W. Moloney, T. Mosandl, *J. Org. Chem.*, **1999**, 64, 3608 – 3611.

## Wide field TEM images

Figure S1. Wide field TEM images of as-synthesized (a-e) and used (f) nanoparticles. a)  $\text{Fe}_3\text{O}_4$ ; b)  $\text{CoFe}_2\text{O}_4$ ; c)  $\text{MnFe}_2\text{O}_4$ ; d)  $\text{MnO}$ ; e)  $\alpha\text{-MnS}$ ; f)  $\text{Fe}_3\text{O}_4$  after 5 runs.

a)

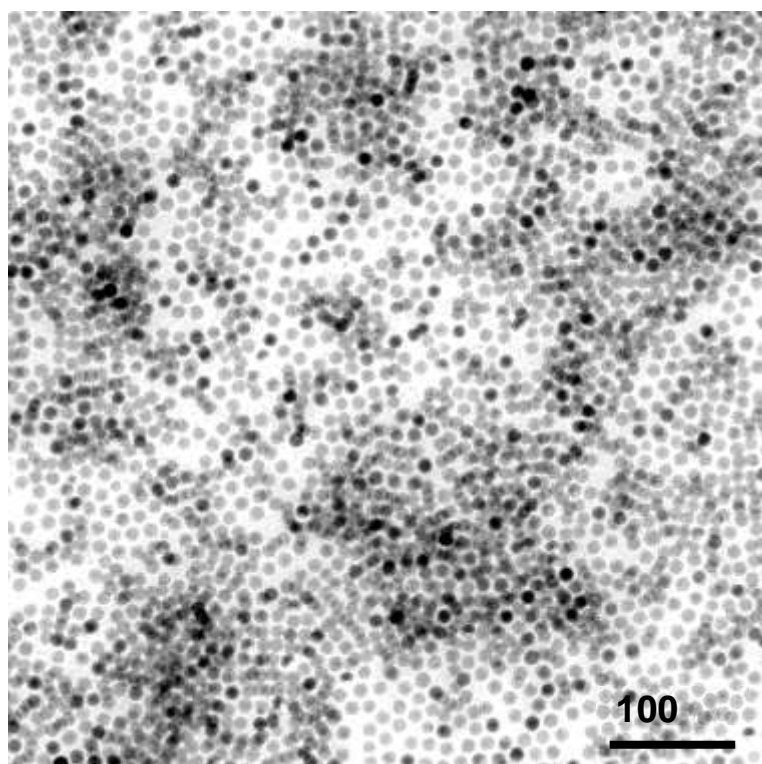

b)

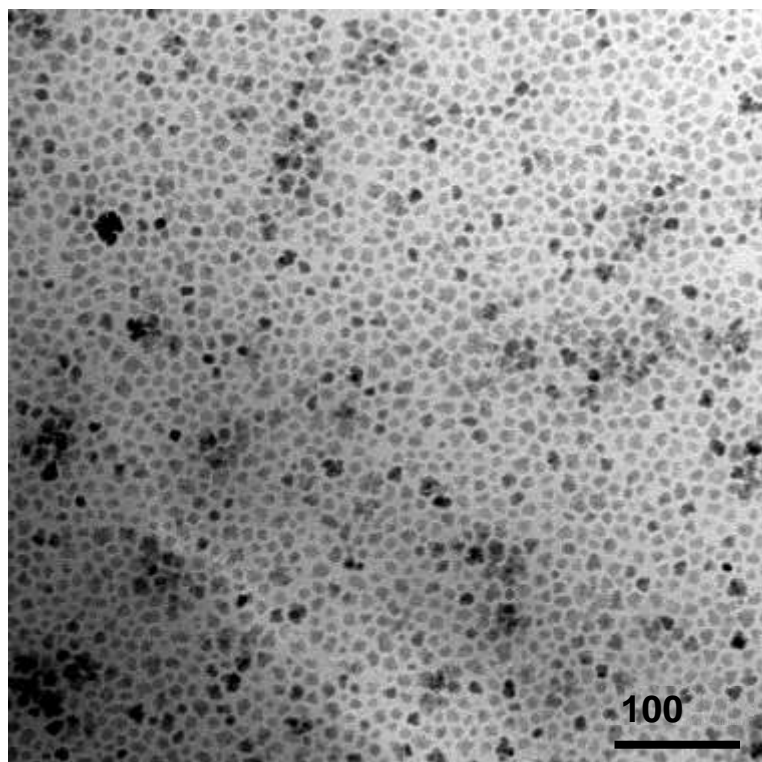

c)

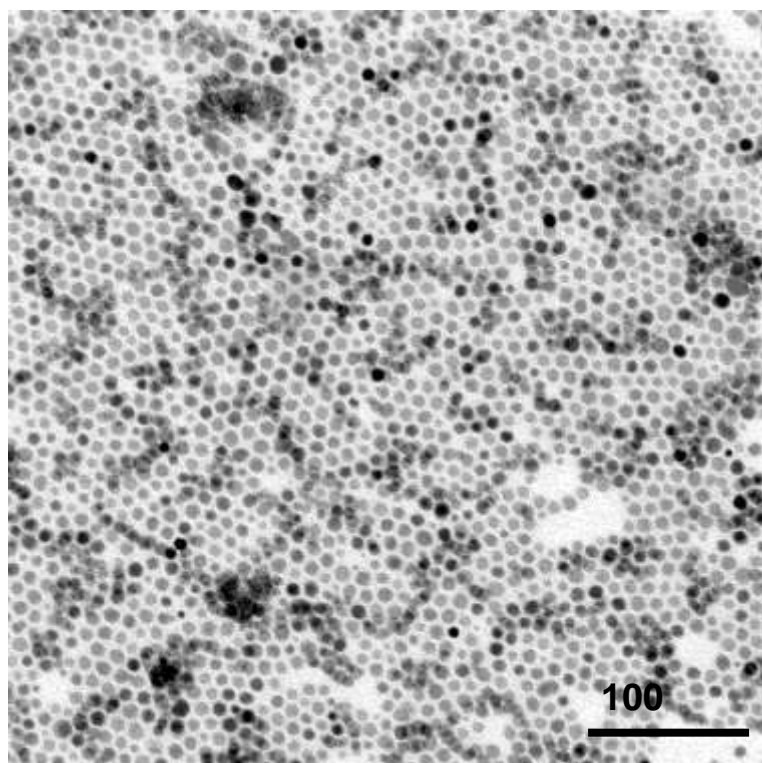

d)

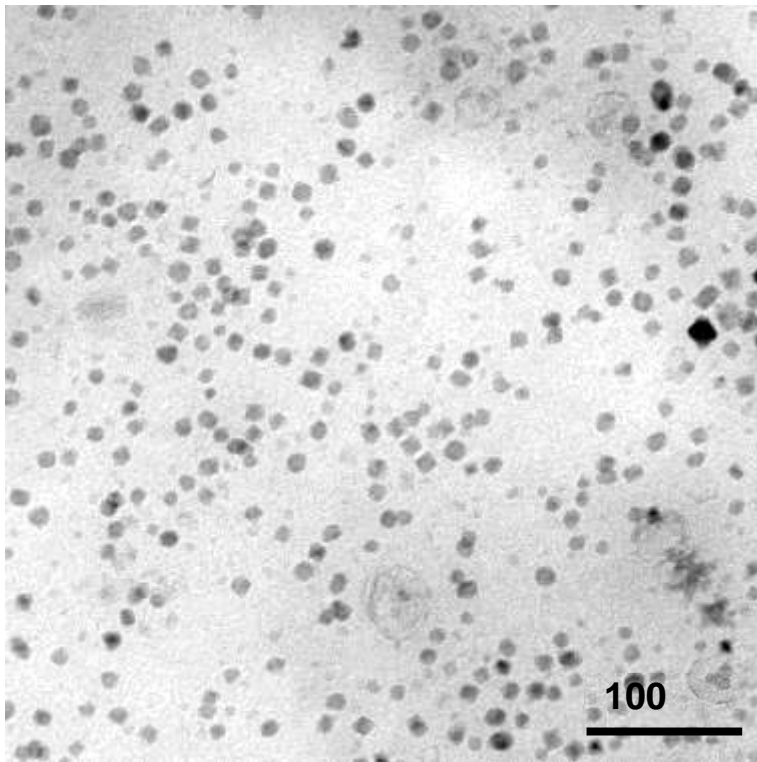

e)

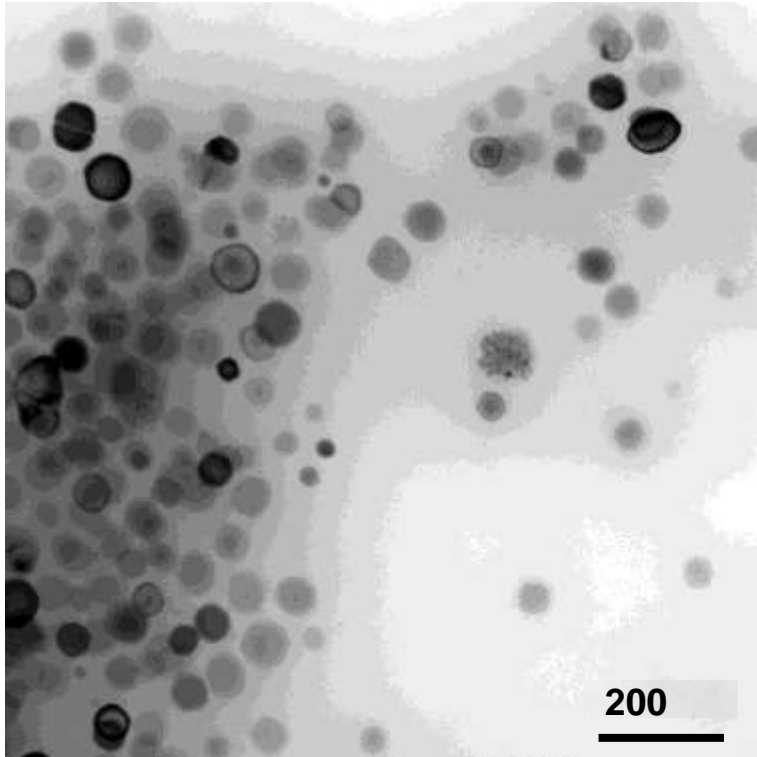

f)

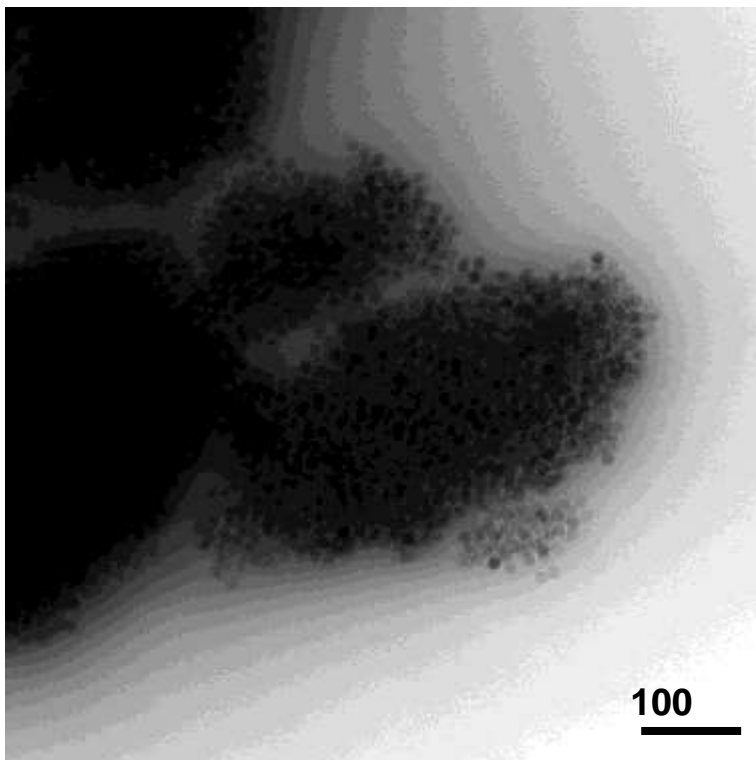

## Distribution of the nanoparticle diameters

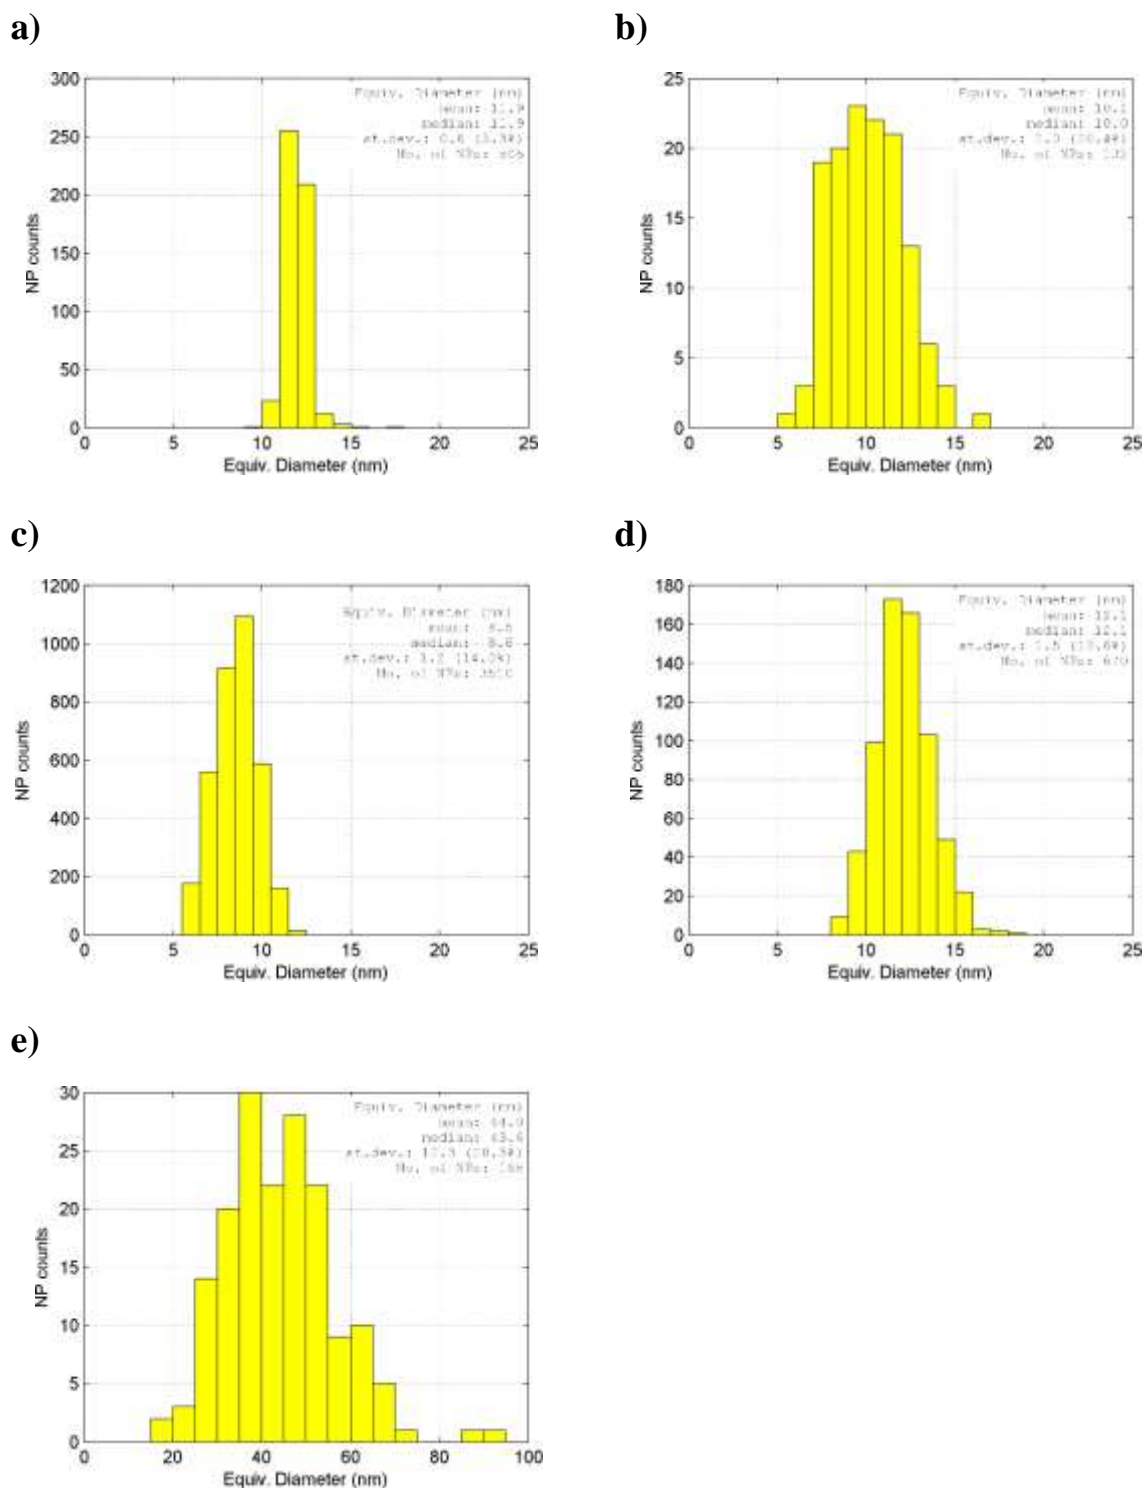

Figure S2. Distribution of the nanoparticle diameter as measured from TEM images using PEBBLES software. a)  $\text{Fe}_3\text{O}_4$ ; b)  $\text{CoFe}_2\text{O}_4$ ; c)  $\text{MnFe}_2\text{O}_4$ ; d)  $\text{MnO}$ ; e)  $\alpha\text{-MnS}$ .



## Determination of Mn concentration in MnO and $\alpha$ -MnS nanoparticle dispersions

30 ml of MnO or  $\alpha$ -MnS NPs in *n*-hexane were evaporated under reduced pressure. 37% Hydrochloric acid (0.25 ml, 3 mmol) was added to the black-brown solid residue and the mixture was warmed at 50 °C for 30 min. Water (2 ml) was added and the clear solution was extracted with light petroleum (2 x 3 ml). The aqueous solution was evaporated under reduced pressure (0.05 mmHg) for 1 h at 50 °C giving  $\text{MnCl}_2 \cdot 4\text{H}_2\text{O}$  as a pale pink solid (13.0 mg from MnO NPs, 11.4 mg from  $\alpha$ -MnS NPs).

## Calculation of the ligand density from elemental analysis

The calculation of the ligand density in the NP coating from elemental analysis (CHN) and TEM data relies on the following assumptions:

1. Each NP consists of an inorganic core and an organic coating, the latter comprising a monolayer of ligands
2. The chemical nature of the ligand is known so that its molar weight and percentage elemental composition can be calculated (in our case the ligand is oleate or stearate)
3. The density of the core is equal to the bulk density of the core material
4. The inorganic core does not contain the element(s) upon which the calculation is based (C or H in our case)

We develop the calculation referring to one NP. The calculation can also be developed referring to a macroscopic sample of NPs. No difference in the final result arises.

The density of ligands on the NP surface  $d = (\text{no. of ligand molecules})/(\text{core surface area})$

$$d = \frac{m_{\text{Sigand}}}{\langle A \rangle} = \frac{m_{\text{Sigand}}}{\langle \pi r^2 \rangle} = \frac{N_A \rho_{\text{Sigand}}}{M_{\text{Sigand}}} \frac{1}{\langle \pi r^2 \rangle}$$

where  $N_A$  is Avogadro number,  $M_{\text{ligand}}$  is the ligand molar weight,  $m_{\text{ligand}}$  is the mass of ligand in the coating,  $\langle A \rangle = \langle \pi r^2 \rangle$  is the mean core surface area, and  $\langle r^2 \rangle$  is the mean value of the square of the core diameter, which is calculated from the results of the analysis of the TEM images.

The only unknown quantity in this equation is  $m_{\text{ligand}}$ . We now show how  $m_{\text{ligand}}$  is related to the *mass fraction of atom X in the NP*  $f_X$ , which is the result of the elemental analysis of a NP sample. To fix the ideas, we chose  $X = C$  (carbon) and use  $f_C$  from the CHN analysis. The NP mass is  $m = m_{\text{ligand}} + m_{\text{core}}$  and the *ligand mass fraction in the NP* is

$$f_{\text{Sigand}}^{\text{NP}} = \frac{m_{\text{Sigand}}}{m_{\text{Sigand}} + m_{\text{core}}}$$

The *carbon mass fraction in the NP* is

$$\rho_C = \frac{\rho_{\text{Sigand}} \rho_{\text{NP Sigand}}}{\rho_{\text{Sigand}} + \rho_{\text{core}}} = \rho_{\text{Sigand}} \frac{\rho_{\text{Sigand}}}{\rho_{\text{Sigand}} + \rho_{\text{core}}}$$

where  $\rho_{\text{Sigand}}$  is the *carbon mass fraction in the pure ligand*, calculated from the ligand chemical formula. By simple algebra we get

$$\rho_{\text{Sigand}} = \frac{\rho_C}{\rho_{\text{Sigand}} - \rho_C} \rho_{\text{core}} = \frac{\rho_C}{\rho_{\text{Sigand}} - \rho_C} \rho_{\text{core}} \langle V \rangle$$

where  $\rho_{\text{core}}$  is the core density (approximated as the bulk density of the core material) and  $\langle V \rangle$  is the mean core volume. The latter can be written as  $(\pi/6) \langle r^3 \rangle$ , which is calculated from the results of the analysis of the TEM images, and inserted in the preceding equation to give

$$\rho_{\text{Sigand}} = \frac{\rho_C}{\rho_{\text{Sigand}} - \rho_C} \rho_{\text{core}} \frac{\langle r^3 \rangle}{6}$$

Thus,  $m_{\text{ligand}}$  is expressed as a combination of known quantities. Inserting this expression in the first equation of this section, we finally get

$$\rho = \frac{1}{6} \frac{\rho_{\text{E}}}{\rho_{\text{Sigand}}} \rho_{\text{core}} \frac{\rho_C}{\rho_{\text{Sigand}} - \rho_C} \frac{\langle r^3 \rangle}{6}$$

## Loss of nanoparticles during recycle

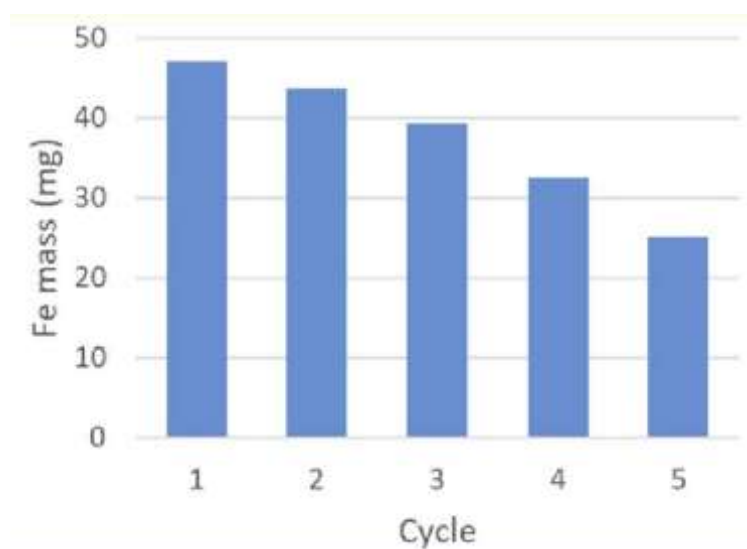

Figure S3. Amount of Fe<sub>3</sub>O<sub>4</sub> NPs recovered after each cycle of the cycloaddition of **1c** to **2**.

## Physical data of compounds **4a**, **5a**, **4b**, **5b**, **4c**, **5c**, and **6**

1-[2-(2-Iodophenylamino)-2-oxoethyl]-4-methoxycarbonyl-1*H*-1,2,3-triazole **4a** (115 mg, 60%), pale yellow powder, m.p. 180-182°C. IR (nujol): 3290 (N-H), 3125 (triazole C-H), 1723 (ester >C=O), 1670 (amide >C=O). <sup>1</sup>H-NMR (δ): 3.98 (3H, s, CH<sub>3</sub>-), 5.31 (2H, s, -CH<sub>2</sub>-), 6.90 (1H, dt, *J* = 7.8, 2.0, aromatic), 7.36 (1H, dt, *J* = 7.8, 2.0, aromatic), 7.77 (1H, dd, *J* = 7.9, 1.8, aromatic), 7.84 (1H, br s, N-H), 8.13 (1H, dd, *J* = 7.9, 1.8, aromatic), 8.34 ppm (1H, s, triazole C-H). <sup>1</sup>H-NMR (δ, CDCl<sub>3</sub>-DMSO-*d*<sub>6</sub>): 3.70 (3H, s, CH<sub>3</sub>-), 5.22 (2H, s, -CH<sub>2</sub>-), 6.74 (1H, dt, *J* = 7.8, 2.0, aromatic), 7.13 (1H, dt, *J* = 7.8, 2.0, aromatic), 7.37 (1H, dd, *J* = 7.9, 1.8, aromatic), 7.62 (1H, dd, *J* = 7.9, 1.8, aromatic), 8.30 (1H, s, triazole C-H), 9.39 ppm (1H, br s, N-H). <sup>13</sup>C-NMR (δ): 50.9 (-CH<sub>3</sub>), 51.7 (-CH<sub>2</sub>-), 93.5 (aromatic, C-I), 125.4 (aromatic), 126.9 (aromatic), 127.8 (aromatic), 129.0 (aromatic), 137.3 (≥C-NH-), 138.2 (triazole-C<sub>5</sub>), 138.4 (triazole-C<sub>4</sub>), 159.9 (amide >C=O), 162.9 ppm (ester >C=O). MS (*m/z*): 386 (M<sup>+</sup>).

1-[2-(2-Iodophenylamino)-2-oxoethyl]-5-methoxycarbonyl-1*H*-1,2,3-triazole **5a** (42 mg, 22%), pale yellow powder, m.p. 170-173°C (from diisopropyl ether). IR (nujol): 3220 (N-H), 3070 (triazole C-H), 1740 (ester >C=O), 1670 (amide >C=O). <sup>1</sup>H-NMR (δ): 3.95 (3H, s, CH<sub>3</sub>-), 5.64 (2H, s, -CH<sub>2</sub>-), 6.88 (1H, dt, *J* = 7.8, 2.0, aromatic), 7.34 (1H, dt, *J* = 7.8, 2.0, aromatic), 7.54 (1H, br s, N-H), 7.76 (1H, dd, *J* = 7.9, 1.8, aromatic), 7.84 (1H, br s, N-H), 8.15 (1H, dd, *J* = 7.9, 1.8, aromatic), 8.24 ppm (1H, s, triazole C-H). <sup>13</sup>C-NMR (δ): 52.9 (-CH<sub>3</sub>), 53.4 (-CH<sub>2</sub>-), 122.2 (aromatic), 126.8 (aromatic), 128.8 (aromatic), 129.4 (aromatic), 137.1 (triazole-C<sub>4</sub>), 138.0 (aromatic), 138.9 (triazole-C<sub>5</sub>), 158.7 (amide >C=O), 162.9 (ester >C=O). MS (*m/z*): 386 (M<sup>+</sup>).

In the case of the reaction carried out at 45°C (Table 3, entry 2), unchanged **1a** was eluted first (60 mg, 40%), followed by **5a** (47 mg, 25%) and **4a** (63 mg, 32%).

1-Benzyl-4-methoxycarbonyl-1*H*-1,2,3-triazole **4b** (73 mg, 67%), white powder, m.p. 116-118°C, *lit.* 115-116.<sup>21</sup> IR (nujol): 3128 (triazole C-H), 1728 (ester >C=O). <sup>1</sup>H-NMR (δ): 3.94 (3H, s, CH<sub>3</sub>-), 5.60 (2H, s, -CH<sub>2</sub>-), 7.3-7.4 (5H, m, aromatics), 7.99 ppm (1H, s, triazole C-H). <sup>13</sup>C-NMR (δ): 52.1 (-CH<sub>3</sub>), 54.5 (-CH<sub>2</sub>-), 127.3 (triazole-C<sub>5</sub>), 128.3 (aromatic), 129.1 (aromatic), 129.3 (aromatic), 133.7 (aromatic), 140.3 (triazole-C<sub>4</sub>), 161.1 ppm (ester >C=O). MS (*m/z*): 217 (M<sup>+</sup>).

1-Benzyl-5-methoxycarbonyl-1*H*-1,2,3-triazole **5b** (25 mg, 23%), colourless oil. IR (nujol): 3137 (triazole C-H), 1727 (ester >C=O). <sup>1</sup>H-NMR (δ): 3.89 (3H, s, CH<sub>3</sub>-), 5.92 (2H, s, -CH<sub>2</sub>-), 7.3-7.4 (5H, m, aromatics), 8.13 ppm (1H, s, triazole C-H). <sup>13</sup>C-NMR (δ, ppm): 52.4 (-CH<sub>3</sub>), 53.4 (-CH<sub>2</sub>-), 127.4 (aromatic), 128.0 (aromatic), 128.7 (aromatic), 129.3 (aromatic), 134.9 (triazole-C<sub>5</sub>), 138.2 (triazole-C<sub>4</sub>), 158.8 ppm (ester >C=O). MS (*m/z*): 217 (M<sup>+</sup>).

1-Phenyl-4-methoxycarbonyl-1*H*-1,2,3-triazole **4c** (72 mg, 70%), white powder, m.p. 120-122°C, *lit.* 120-121.5.<sup>22</sup> IR (nujol): 3125 (triazole C-H), 1725 (ester >C=O). <sup>1</sup>H-NMR (δ): 4.00 (3H, s, CH<sub>3</sub>-), 7.4-7.7 (5H, m, aromatics), 8.51 ppm (1H, s, triazole C-H). <sup>13</sup>C-NMR (δ): 52.3 (-CH<sub>3</sub>), 120.8 (aromatic), 125.6 (aromatic), 128.9 (triazole-C<sub>5</sub>), 129.5 (aromatic), 136.3 (aromatic), 140.5 (triazole-C<sub>4</sub>), 161.0 ppm (ester >C=O). MS (*m/z*): 203 (M<sup>+</sup>).

1-Phenyl-5-methoxycarbonyl-1*H*-1,2,3-triazole **5c** (25 mg, 25%), white powder, m.p. 98-100°C (from diisopropyl ether), *lit.* 99-100.5.<sup>22</sup> IR (nujol): 3120 (triazole C-H), 1730 (ester >C=O). <sup>1</sup>H-NMR (δ): 3.85 (3H, s, CH<sub>3</sub>-), 7.4-7.7 (5H, m, aromatics), 8.26 ppm (1H, s, triazole C-H). <sup>13</sup>C-NMR (δ): 53.3 (-CH<sub>3</sub>), 120.8 (aromatic), 125.8 (aromatic), 129.9 (aromatic), 130.1 (triazole-C<sub>4</sub>), 137.1 (aromatic), 140.8 (triazole-C<sub>5</sub>), 161.6 ppm (ester >C=O). MS (*m/z*): 203 (M<sup>+</sup>).

1-[2-(2-Iodophenylamino)-2-oxoethyl]-4,5-dimethoxycarbonyl-1*H*-1,2,3-triazole **6**, pale yellow powder, m.p. 171-172°C (from diisopropyl ether). IR (nujol): 3210 (amide N-H), 1759 (ester >C=O), 1733 (ester >C=O). <sup>1</sup>H-NMR (δ): 3.98 (3H, s, CH<sub>3</sub>-), 3.99 (3H, s, CH<sub>3</sub>-), 5.54 (2H, s, -CH<sub>2</sub>-), 6.88 (1H, dt, *J* = 7.6, 2.0, aromatic), 7.34 (1H, dt, *J* = 7.6, 2.0, aromatic), 7.55 (1H, br s, N-H), 7.77 (1H, dd, *J* = 7.8, 1.8, aromatic), 8.09 ppm (1H, dd, *J* = 7.8, 1.8, aromatic). <sup>13</sup>C-NMR (δ): 52.7 (-CH<sub>3</sub>), 52.9 (t, -CH<sub>2</sub>-), 53.7 (-CH<sub>3</sub>), 122.9 (aromatic), 127.2 (aromatic), 129.3 (aromatic), 130.6 (aromatic), 137.1 (triazole C), 139.0 (aromatic), 140.0 (triazole C), 158.6 (amide >C=O), 160.2 (ester >C=O), 162.5 (ester >C=O). We were not able to assign the two ester CH<sub>3</sub> peaks to the two ester groups in the molecule. MS (*m/z*): 444 (M<sup>+</sup>).

$^1\text{H}$ - and  $^{13}\text{C}$ -NMR spectra of compounds **4a**, **5a**, **4b**, **5b**, **4c**, **5c**, and **6**  
Figure S3.  $^1\text{H}$ - and  $^{13}\text{C}$ -NMR spectra of compounds **4a**, **5a**, **4b**, **5b**, **4c**, **5c**, and **6**.

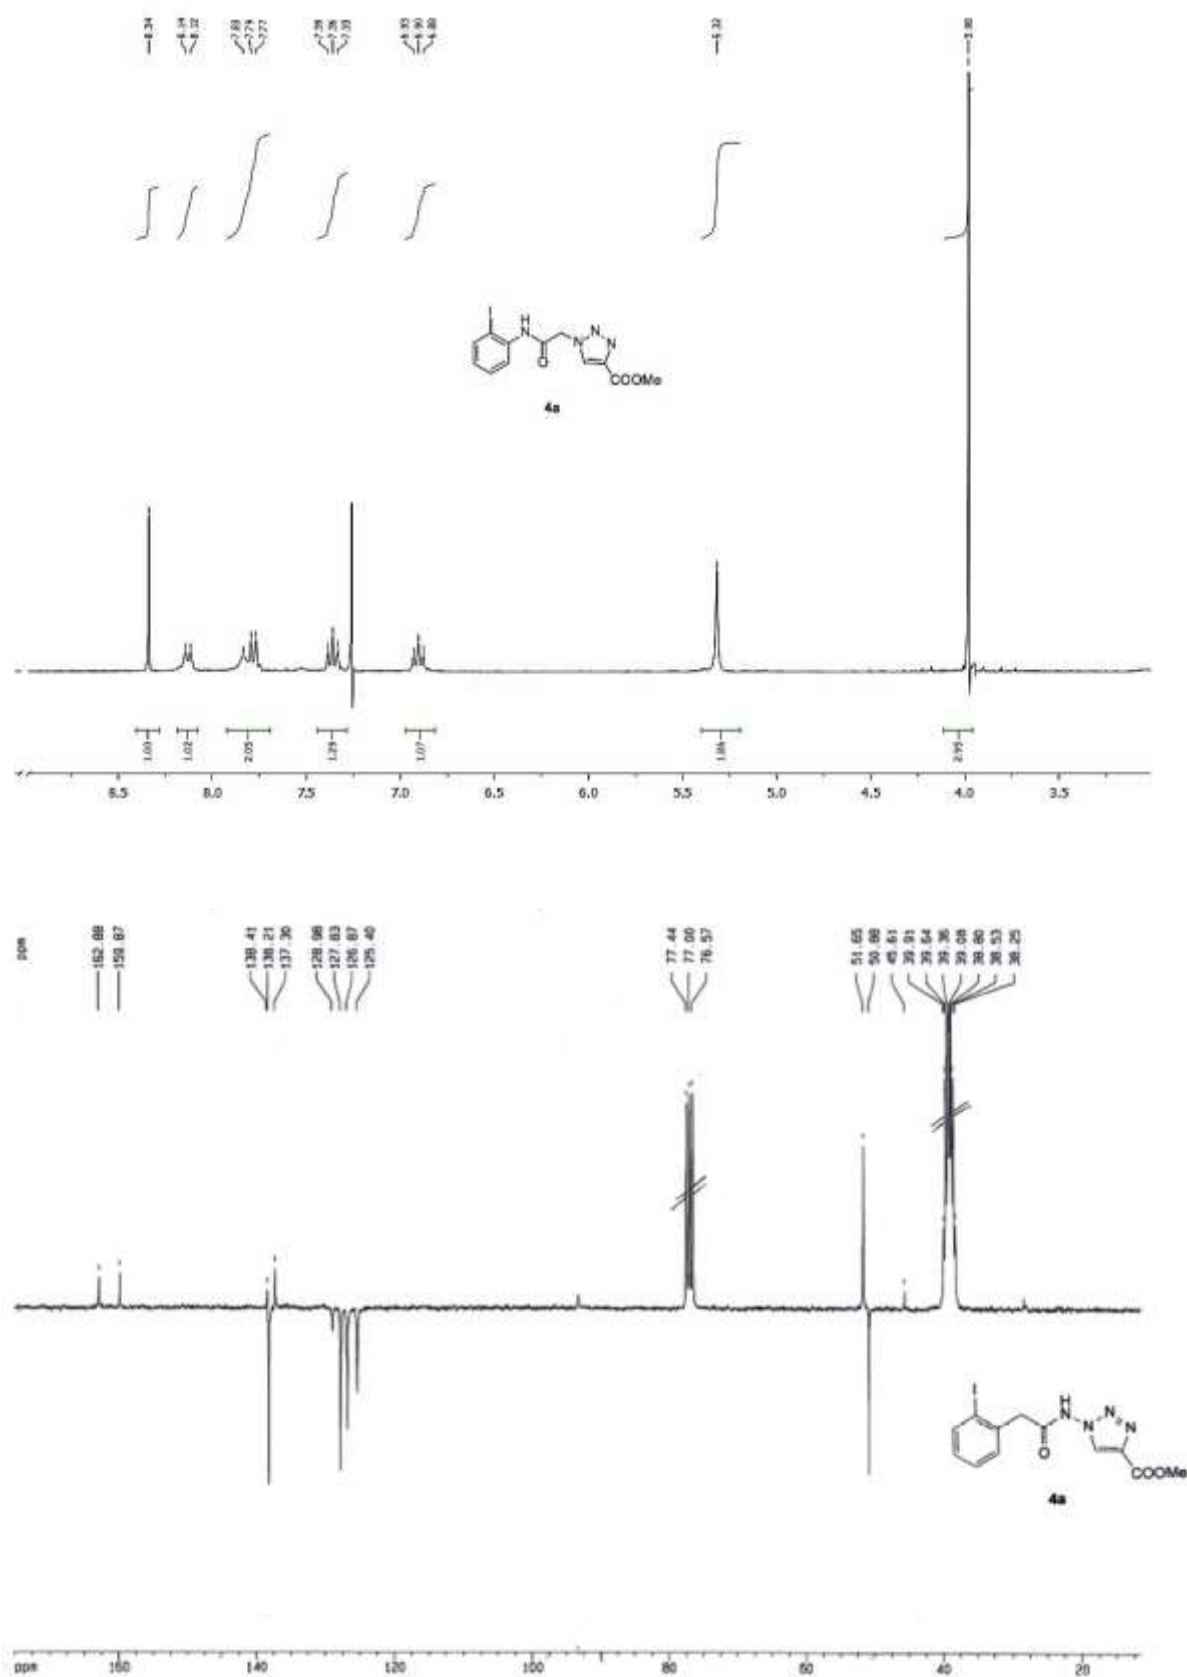

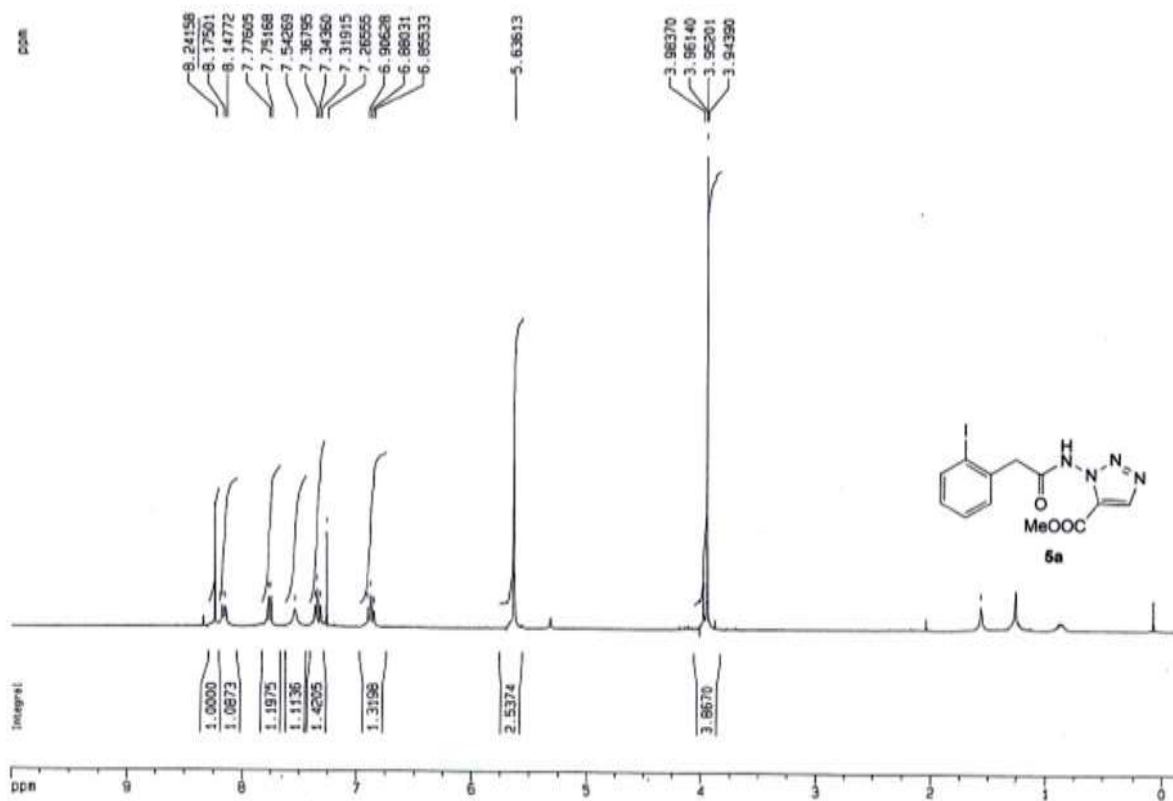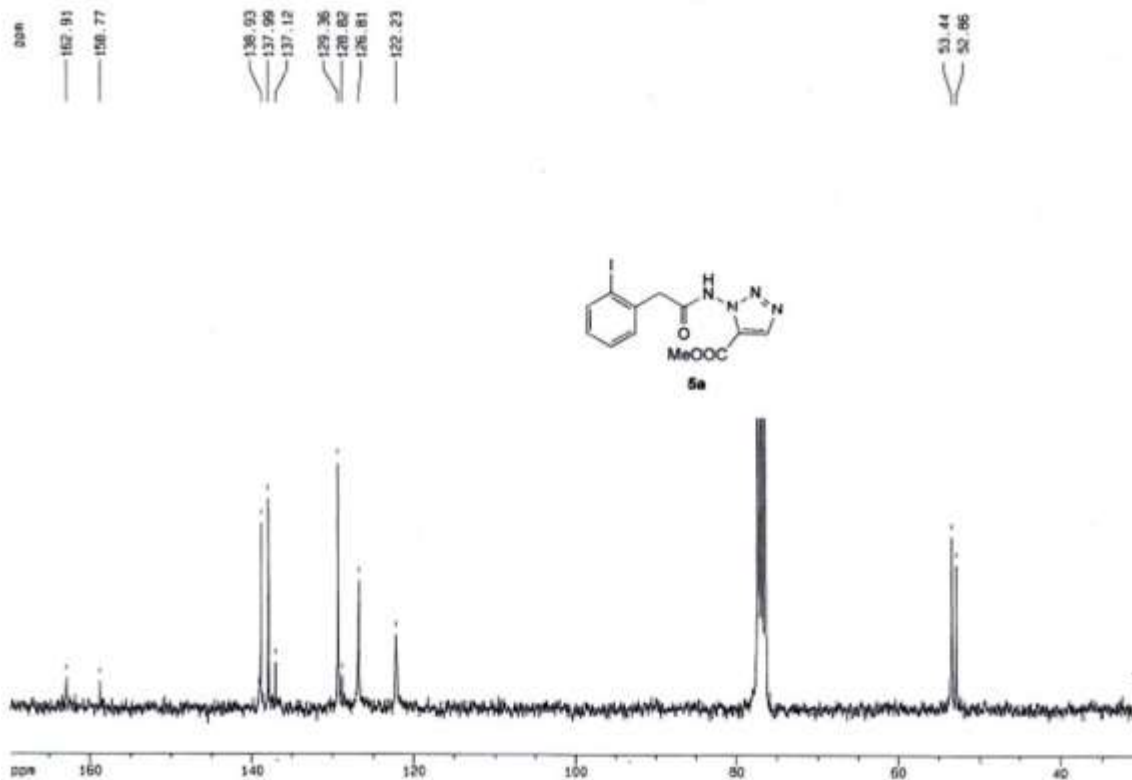



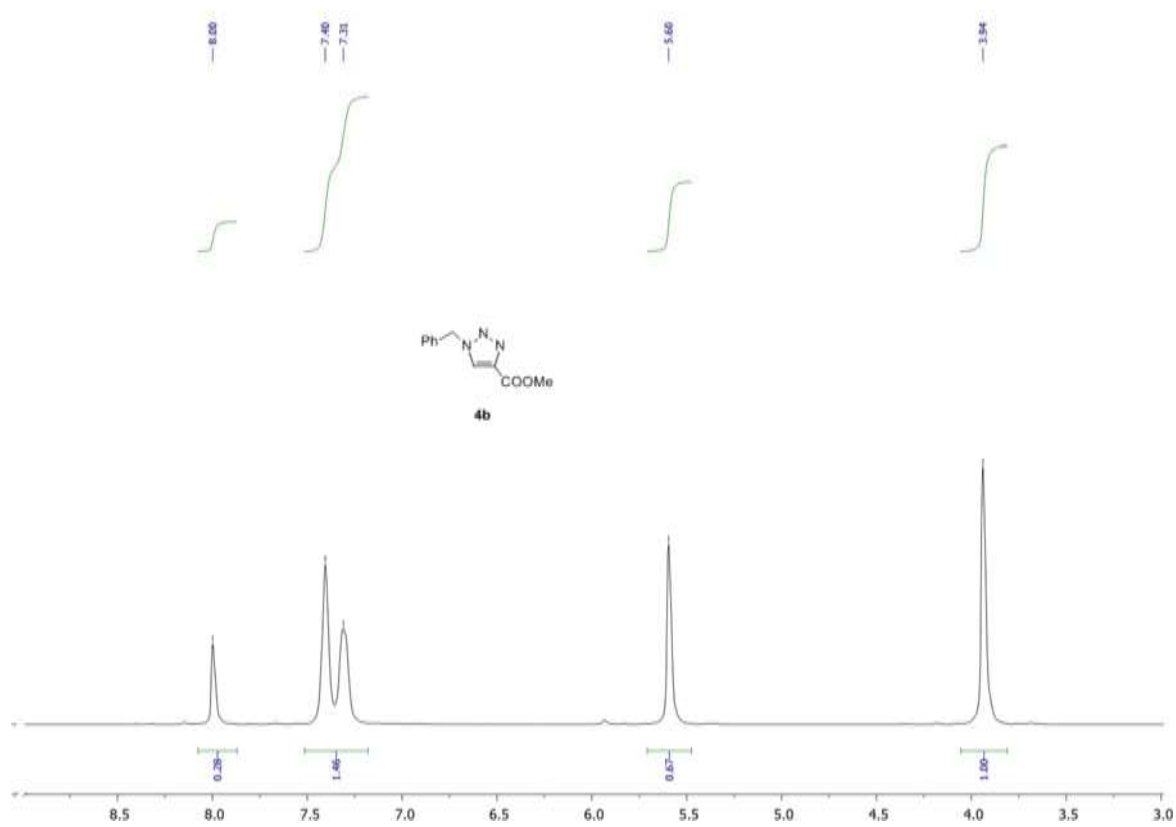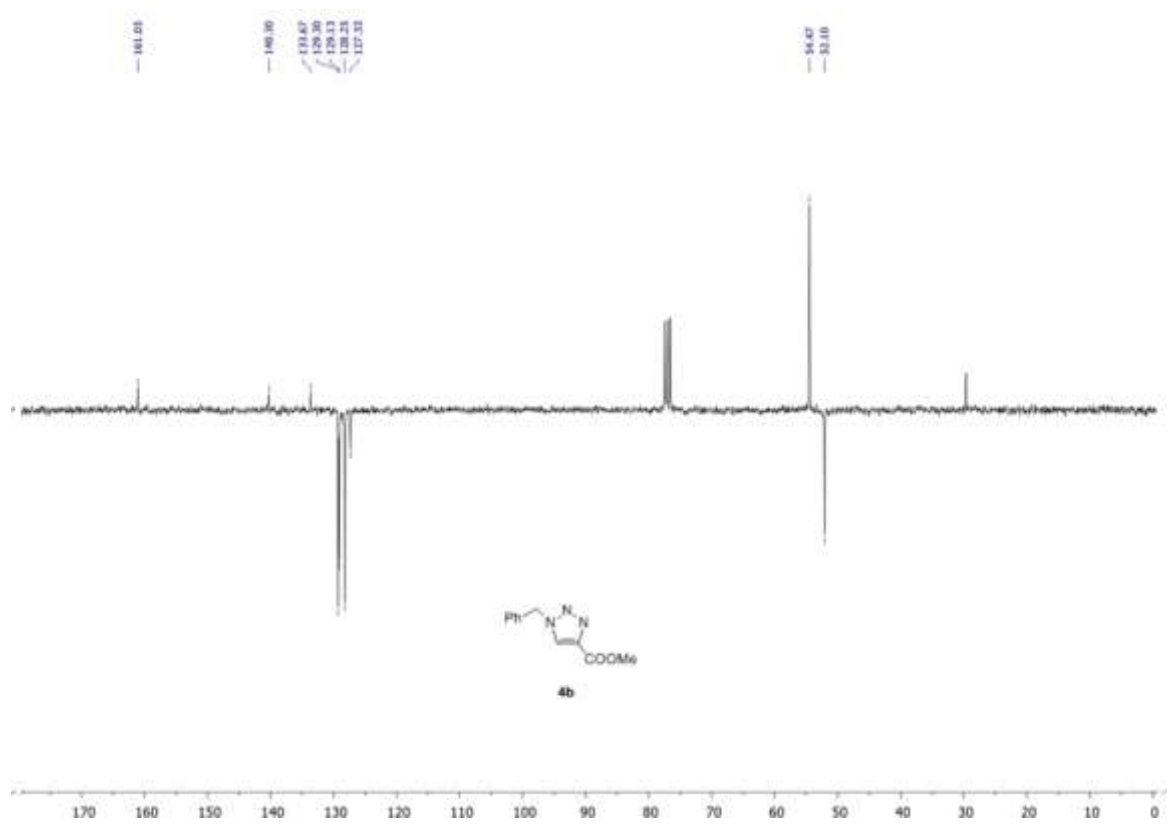

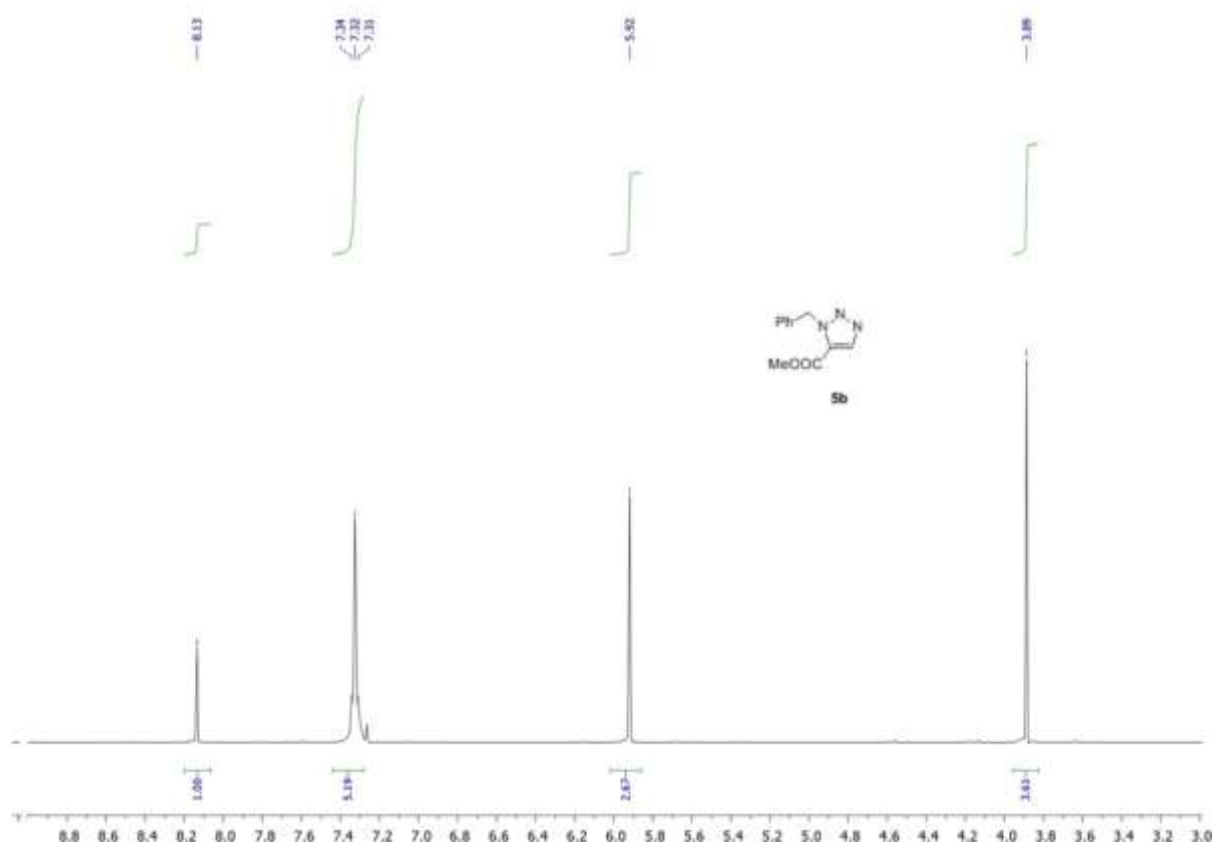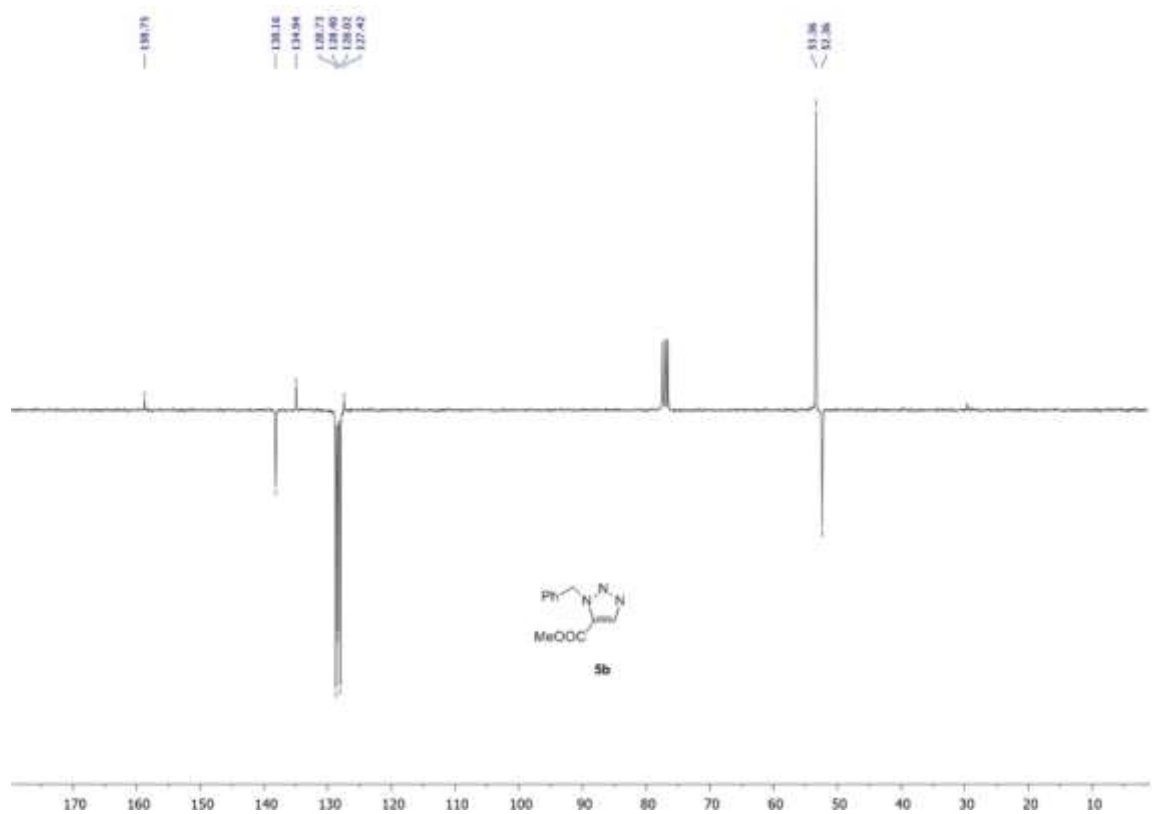

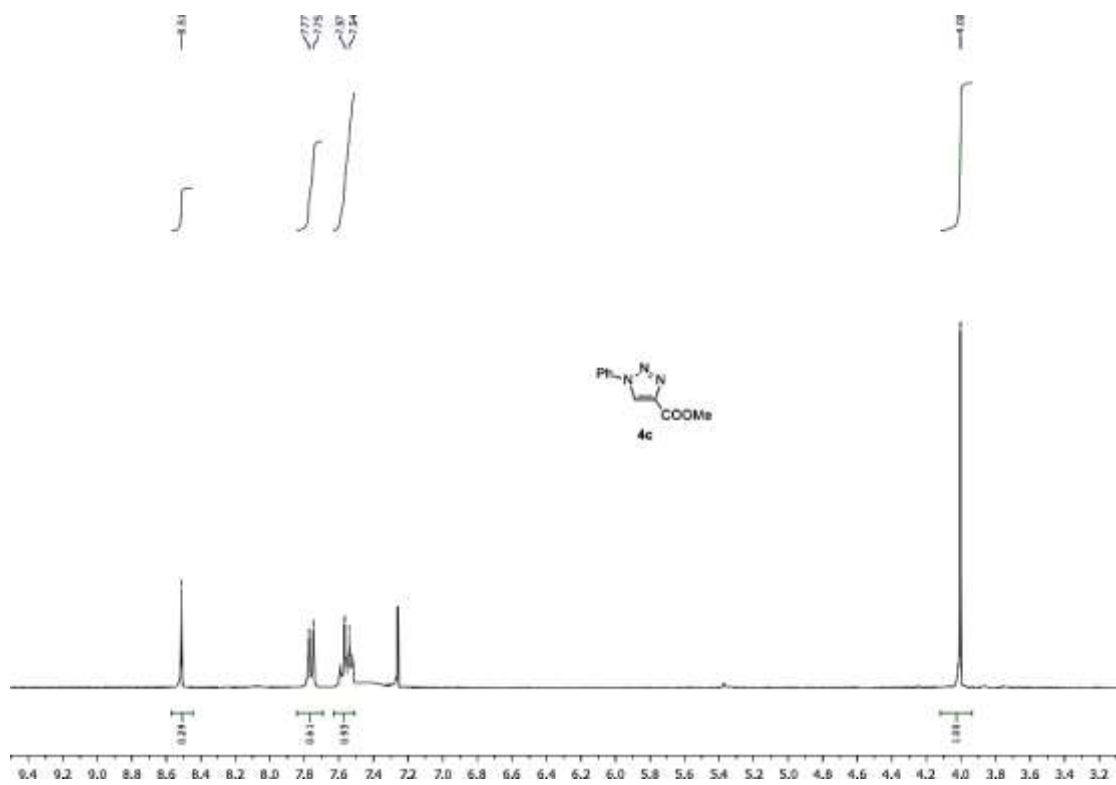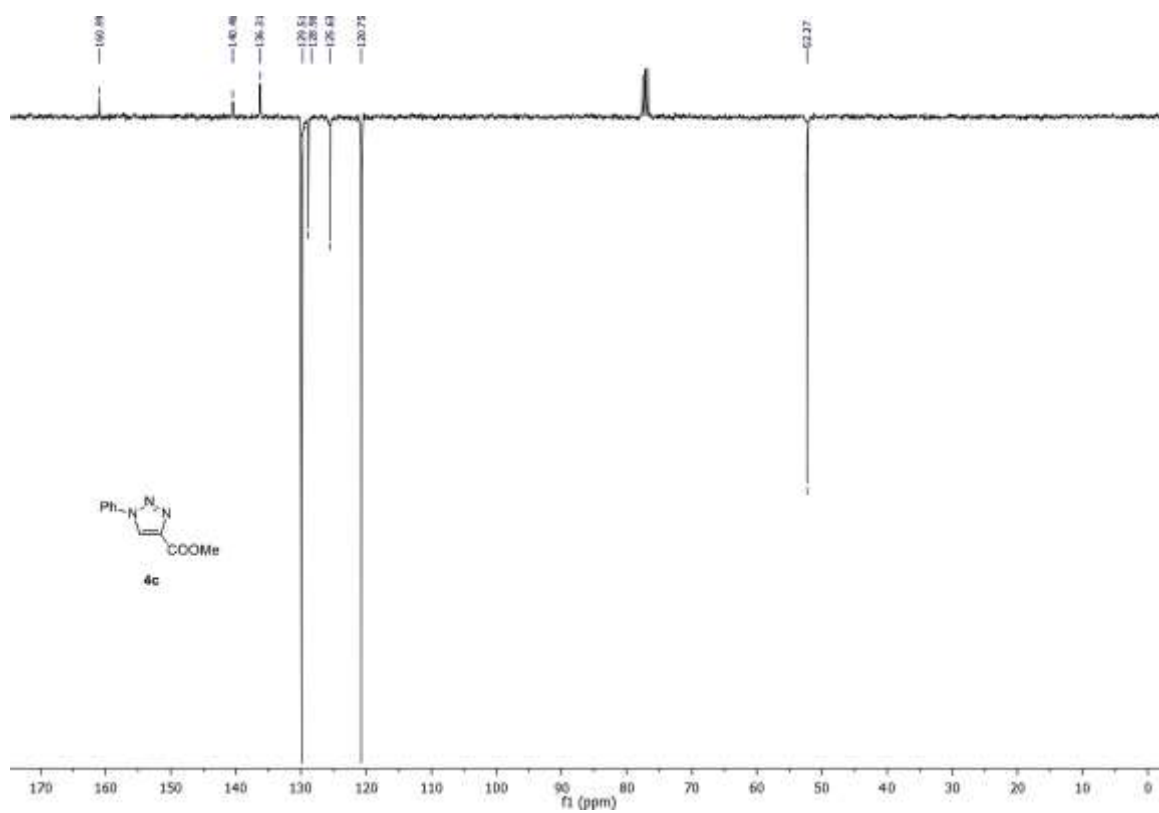

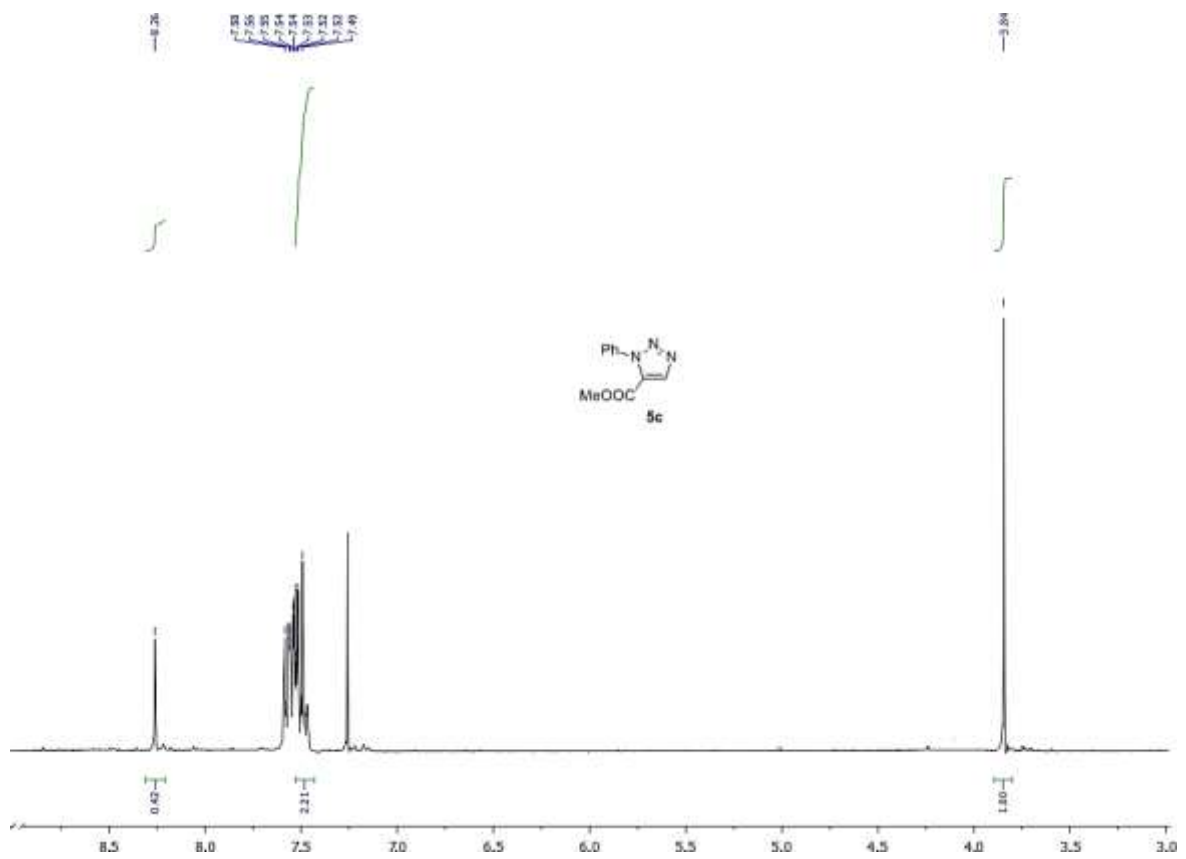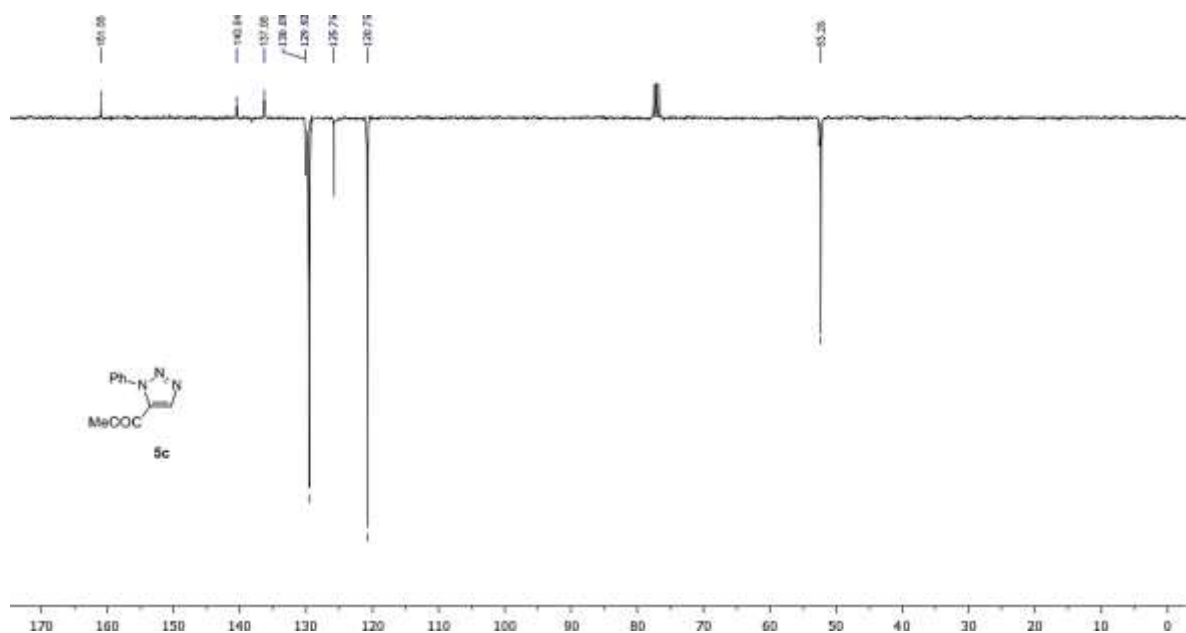

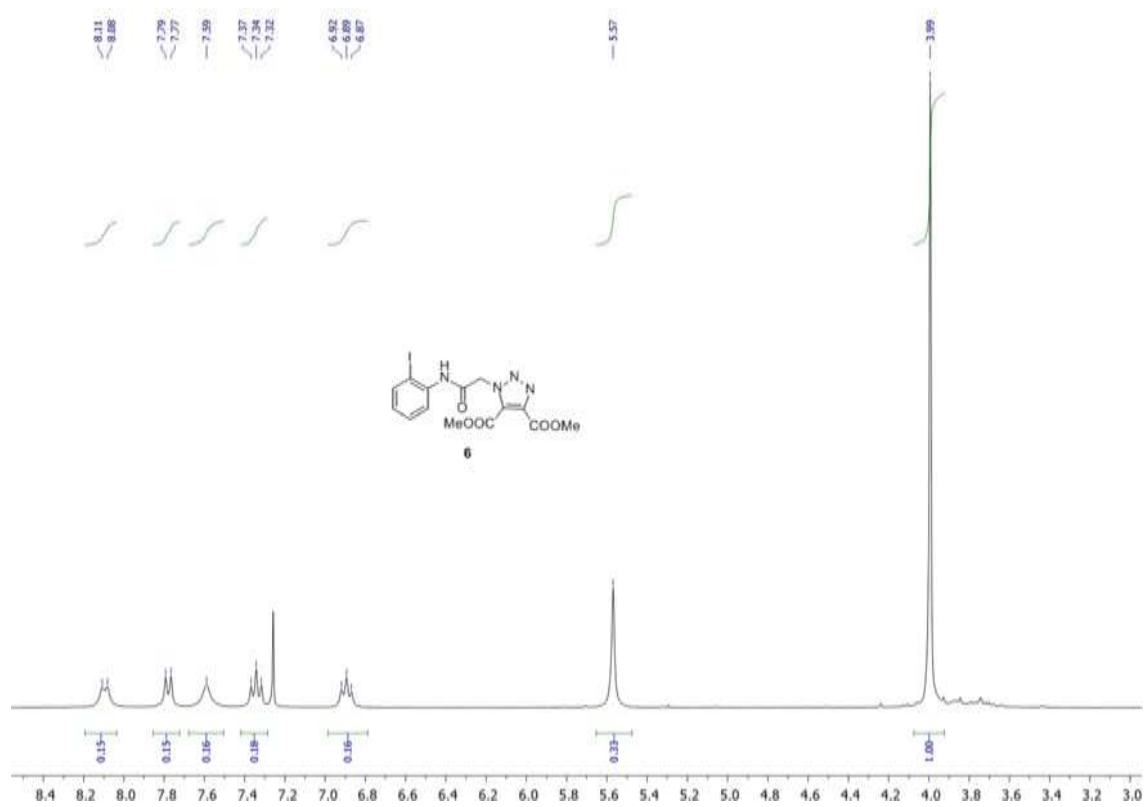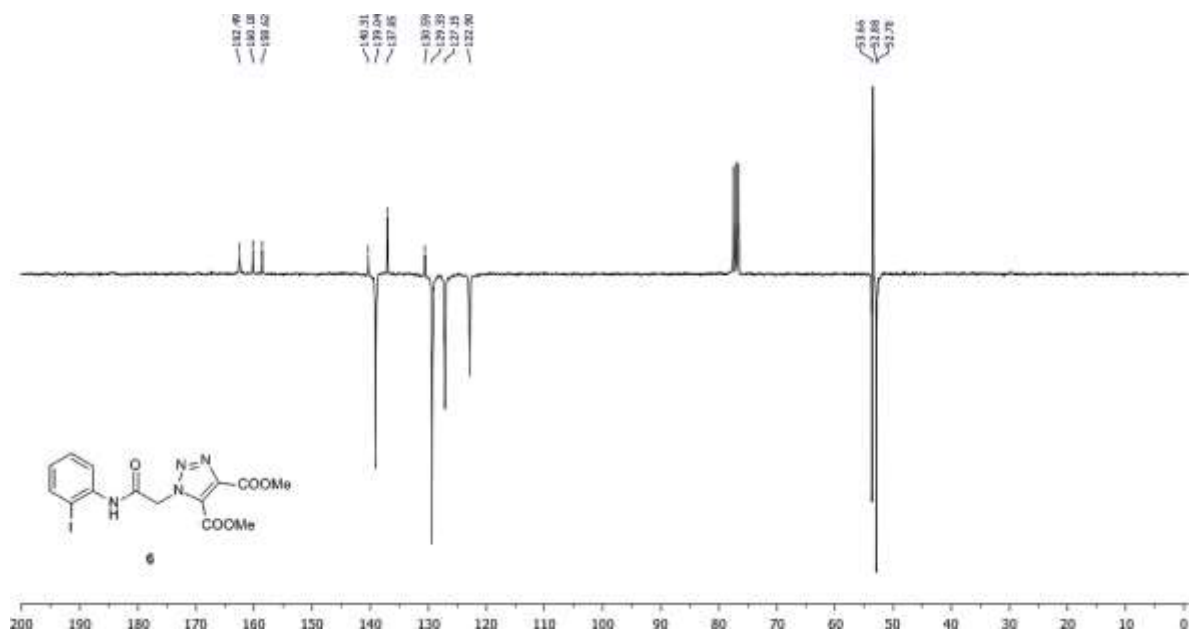

Electron density corresponding to relevant molecular orbitals of **1c** and **2** from periodic DFT calculations

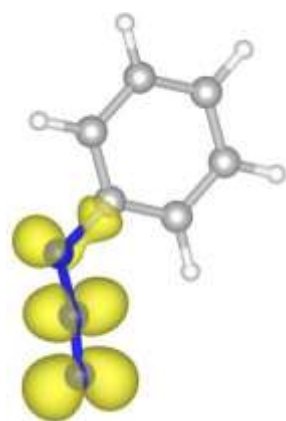

LUMO

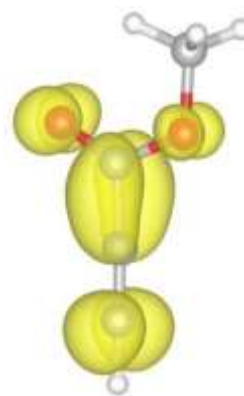

LUMO

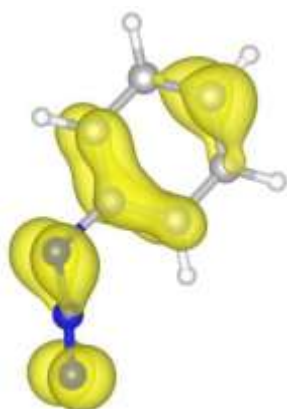

HOMO

Phenyl azide **1c**

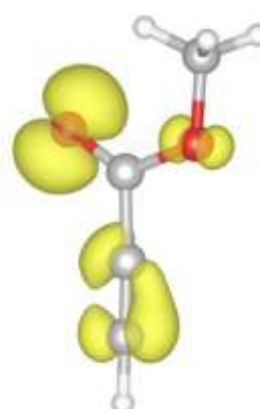

HOMO

Methyl propiolate **2**

Figure S4. Electron density corresponding to relevant molecular orbitals of **1c** and **2** from periodic DFT calculations.

## Electron density of relevant states of **1c** adsorbed on the (001) face of magnetite from periodic DFT calculations

Figure S5. Electron density of relevant states of **1c** adsorbed on the (001) face of magnetite from periodic DFT calculations. Each electron density plot refers to a peak in the density of states (DOS) of the **1c**-magnetite system. (See Figure 6 in the main text). All electronic states contained in an energy window centered on the peak maximum  $E$  and with width equal to the full-width-at-half-height of the peak were considered when calculating the electron density corresponding to the peak.

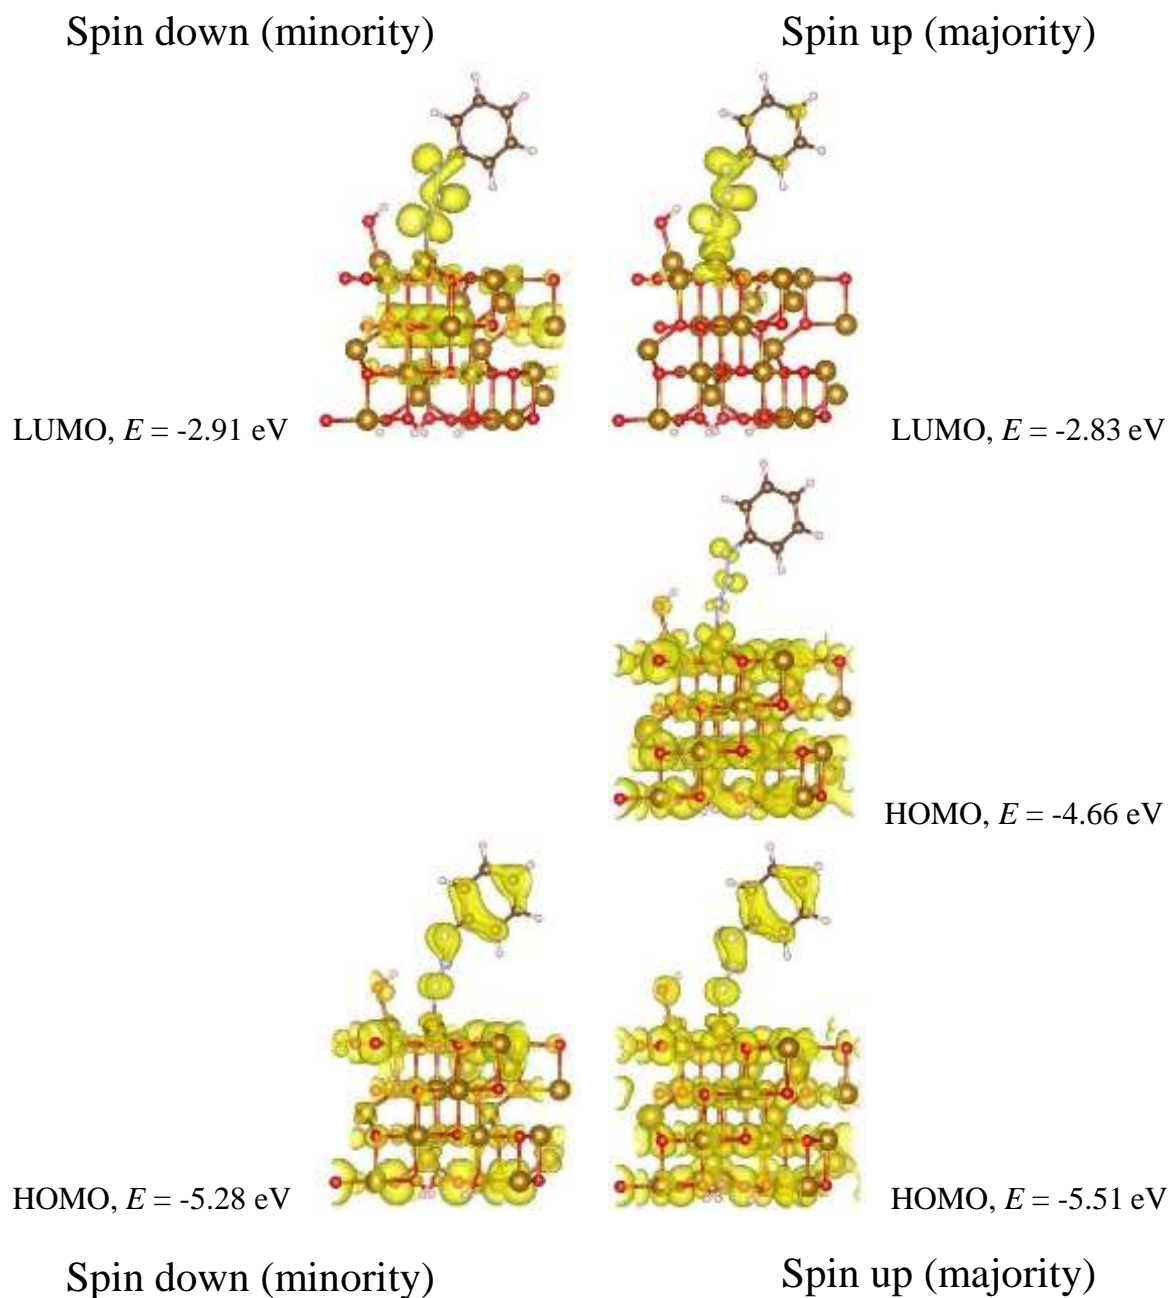

## Geometrical parameters and minimum energy structure of **1c** and **2** (OPBE/LANLDZ)

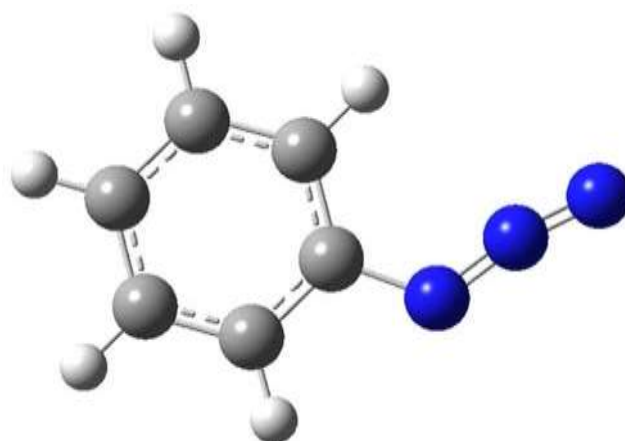

**1c**

| Center Number | Atomic Number | Atomic Type | Coordinates (Angstroms) |           |           |
|---------------|---------------|-------------|-------------------------|-----------|-----------|
|               |               |             | X                       | Y         | Z         |
| 1             | 7             | 0           | 0.681671                | 0.129814  | -0.008713 |
| 2             | 7             | 0           | -0.220808               | 0.890663  | -0.007186 |
| 3             | 7             | 0           | -1.012020               | 1.863639  | -0.005746 |
| 4             | 6             | 0           | -2.429257               | 1.699520  | -0.003633 |
| 5             | 6             | 0           | -3.086608               | 0.447051  | -0.002947 |
| 6             | 6             | 0           | -4.490325               | 0.405552  | -0.000846 |
| 7             | 6             | 0           | -5.244651               | 1.593902  | 0.000575  |
| 8             | 6             | 0           | -4.581473               | 2.836440  | -0.000126 |
| 9             | 6             | 0           | -3.180037               | 2.895202  | -0.002218 |
| 10            | 1             | 0           | -2.514626               | -0.481462 | -0.004028 |
| 11            | 1             | 0           | -4.995137               | -0.561356 | -0.000316 |
| 12            | 1             | 0           | -6.333891               | 1.551702  | 0.002197  |
| 13            | 1             | 0           | -5.156130               | 3.763099  | 0.000960  |
| 14            | 1             | 0           | -2.655406               | 3.849432  | -0.002772 |



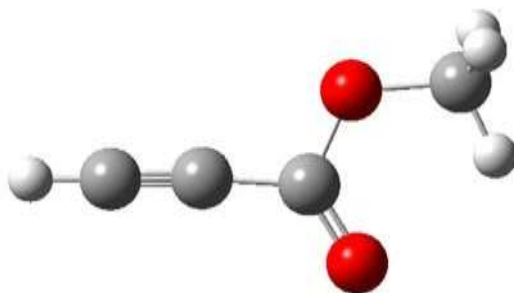

2

| Center<br>Number | Atomic<br>Number | Atomic<br>Type | Coordinates (Angstroms) |           |           |
|------------------|------------------|----------------|-------------------------|-----------|-----------|
|                  |                  |                | X                       | Y         | Z         |
| 1                | 6                | 0              | -2.233360               | 0.041355  | 0.000000  |
| 2                | 6                | 0              | -1.006473               | -0.031943 | 0.000000  |
| 3                | 6                | 0              | 0.426527                | -0.220150 | 0.000000  |
| 4                | 8                | 0              | 0.999295                | -1.328290 | 0.000000  |
| 5                | 8                | 0              | 1.067587                | 1.011762  | 0.000000  |
| 6                | 6                | 0              | 2.540177                | 1.019261  | 0.000000  |
| 7                | 1                | 0              | -3.303682               | 0.113058  | 0.000000  |
| 8                | 1                | 0              | 2.941130                | -0.001005 | 0.000000  |
| 9                | 1                | 0              | 2.856734                | 1.560743  | -0.899398 |
| 10               | 1                | 0              | 2.856734                | 1.560743  | 0.899398  |

# Geometrical parameters and structure of the regioisomeric transition states of the **1c + 2** reaction leading the **4** and **5** cycloadducts (OPBE /LANLDZ)

Figure S6. Geometrical parameters and structure of the regioisomeric transition states of the **1c + 2** reaction leading the **4** and **5** cycloadducts (OPBE /LANLDZ)

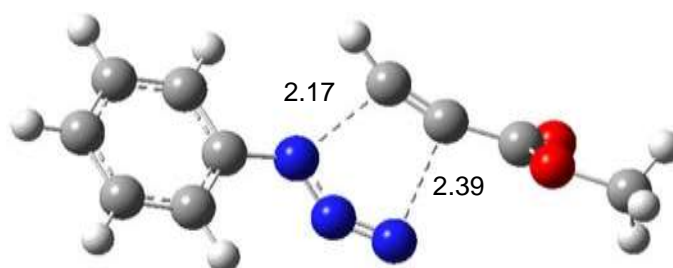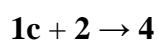

| Center Number | Atomic Number | Atomic Type | Coordinates (Angstroms) |           |           |
|---------------|---------------|-------------|-------------------------|-----------|-----------|
|               |               |             | X                       | Y         | Z         |
| 1             | 6             | 0           | -0.784246               | 1.321192  | -0.414563 |
| 2             | 6             | 0           | -1.868091               | 0.752217  | -0.143716 |
| 3             | 7             | 0           | -1.088327               | -1.128329 | 1.112642  |
| 4             | 7             | 0           | 0.048164                | -0.784315 | 0.979983  |
| 5             | 7             | 0           | 0.782775                | 0.165752  | 0.549947  |
| 6             | 6             | 0           | 2.156109                | 0.018989  | 0.217401  |
| 7             | 6             | 0           | 2.772221                | -1.235438 | -0.003725 |
| 8             | 6             | 0           | 4.127668                | -1.287603 | -0.362022 |
| 9             | 6             | 0           | 4.874774                | -0.104479 | -0.521146 |
| 10            | 6             | 0           | 4.254968                | 1.140436  | -0.303473 |
| 11            | 6             | 0           | 2.904474                | 1.208244  | 0.072123  |
| 12            | 1             | 0           | -0.098748               | 2.034903  | -0.832954 |
| 13            | 1             | 0           | 2.197263                | -2.154184 | 0.110871  |
| 14            | 1             | 0           | 4.599764                | -2.257483 | -0.523164 |
| 15            | 1             | 0           | 5.925937                | -0.152947 | -0.805383 |
| 16            | 1             | 0           | 4.826406                | 2.062551  | -0.413575 |
| 17            | 1             | 0           | 2.431948                | 2.169171  | 0.271548  |
| 18            | 6             | 0           | -3.276646               | 0.472187  | 0.031419  |
| 19            | 8             | 0           | -4.005384               | 0.969199  | 0.914502  |
| 20            | 8             | 0           | -3.719123               | -0.427317 | -0.931276 |
| 21            | 6             | 0           | -5.138643               | -0.802878 | -0.847507 |
| 22            | 1             | 0           | -5.352769               | -1.279821 | 0.117920  |
| 23            | 1             | 0           | -5.780546               | 0.080146  | -0.965661 |
| 24            | 1             | 0           | -5.287015               | -1.506346 | -1.672165 |

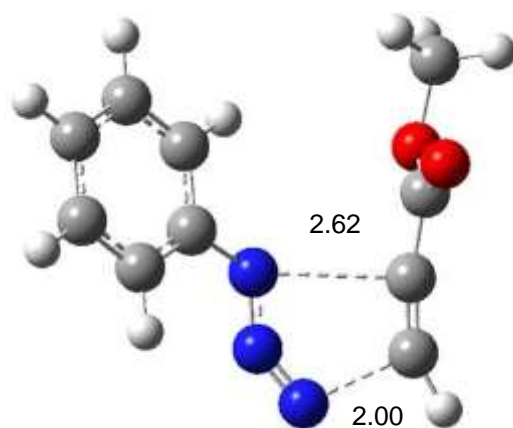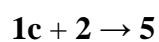

| Center Number | Atomic Number | Atomic Type | Coordinates (Angstroms) |           |           |
|---------------|---------------|-------------|-------------------------|-----------|-----------|
|               |               |             | X                       | Y         | Z         |
| 1             | 6             | 0           | -2.260650               | 0.923880  | 0.235478  |
| 2             | 6             | 0           | -2.395611               | 2.170259  | 0.158980  |
| 3             | 7             | 0           | -0.705647               | 3.086680  | -0.392461 |
| 4             | 7             | 0           | 0.116453                | 2.209718  | -0.495491 |
| 5             | 7             | 0           | 0.254865                | 0.947921  | -0.506034 |
| 6             | 6             | 0           | 1.484827                | 0.288905  | -0.253369 |
| 7             | 6             | 0           | 2.604123                | 0.919217  | 0.342263  |
| 8             | 6             | 0           | 3.770057                | 0.176832  | 0.580217  |
| 9             | 6             | 0           | 3.831773                | -1.190157 | 0.246201  |
| 10            | 6             | 0           | 2.713701                | -1.812057 | -0.341650 |
| 11            | 6             | 0           | 1.545068                | -1.079881 | -0.598105 |
| 12            | 1             | 0           | -2.968097               | 3.080435  | 0.223082  |
| 13            | 1             | 0           | 2.559391                | 1.975748  | 0.606384  |
| 14            | 1             | 0           | 4.632740                | 0.667545  | 1.032582  |
| 15            | 1             | 0           | 4.740056                | -1.761187 | 0.439293  |
| 16            | 1             | 0           | 2.753876                | -2.868511 | -0.608679 |
| 17            | 1             | 0           | 0.680938                | -1.546770 | -1.067331 |
| 18            | 6             | 0           | -2.336564               | -0.488292 | 0.509828  |
| 19            | 8             | 0           | -2.217827               | -1.004755 | 1.642471  |
| 20            | 8             | 0           | -2.606024               | -1.211669 | -0.648517 |
| 21            | 6             | 0           | -2.785335               | -2.660069 | -0.464965 |
| 22            | 1             | 0           | -1.890153               | -3.109992 | -0.015731 |
| 23            | 1             | 0           | -3.650012               | -2.860859 | 0.181368  |
| 24            | 1             | 0           | -2.955962               | -3.047073 | -1.473962 |

Geometrical parameters and minimum energy structure of **1c-Fe(OH)<sub>3</sub>** and **1c-Fe<sub>2</sub>(OH)<sub>4</sub>** (OPBE/LANL2/LANL2DZ)

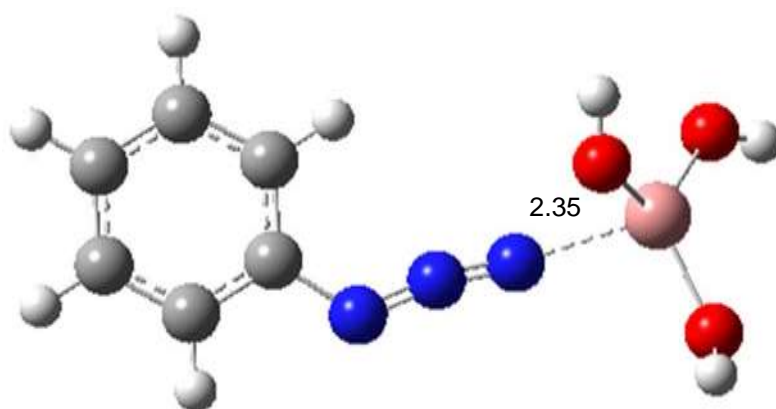

**1c-Fe(OH)<sub>3</sub>**

| Center Number | Atomic Number | Atomic Type | Coordinates (Angstroms) |           |           |
|---------------|---------------|-------------|-------------------------|-----------|-----------|
|               |               |             | X                       | Y         | Z         |
| 1             | 7             | 0           | 0.889690                | -0.527083 | -0.922247 |
| 2             | 7             | 0           | -0.225350               | -0.770412 | -0.617628 |
| 3             | 7             | 0           | -1.327740               | -1.260216 | -0.317994 |
| 4             | 6             | 0           | -2.522383               | -0.493877 | -0.156115 |
| 5             | 6             | 0           | -2.579482               | 0.912571  | -0.284701 |
| 6             | 6             | 0           | -3.808927               | 1.565334  | -0.104401 |
| 7             | 6             | 0           | -4.972110               | 0.833562  | 0.202320  |
| 8             | 6             | 0           | -4.901692               | -0.566936 | 0.330404  |
| 9             | 6             | 0           | -3.681459               | -1.235810 | 0.152648  |
| 10            | 1             | 0           | -1.683676               | 1.488981  | -0.517038 |
| 11            | 1             | 0           | -3.855969               | 2.650291  | -0.202370 |
| 12            | 1             | 0           | -5.921865               | 1.349980  | 0.341247  |
| 13            | 1             | 0           | -5.797354               | -1.140575 | 0.569004  |
| 14            | 1             | 0           | -3.611147               | -2.318060 | 0.248583  |
| 15            | 26            | 0           | 2.884920                | 0.134152  | 0.131550  |
| 16            | 8             | 0           | 2.104572                | 0.870673  | 1.624388  |
| 17            | 8             | 0           | 3.676818                | -1.508281 | 0.318720  |
| 18            | 8             | 0           | 3.618085                | 1.312567  | -1.062706 |
| 19            | 1             | 0           | 2.057159                | 1.815141  | 1.868904  |
| 20            | 1             | 0           | 3.710880                | -2.093663 | 1.099472  |
| 21            | 1             | 0           | 4.338371                | 1.175196  | -1.707175 |

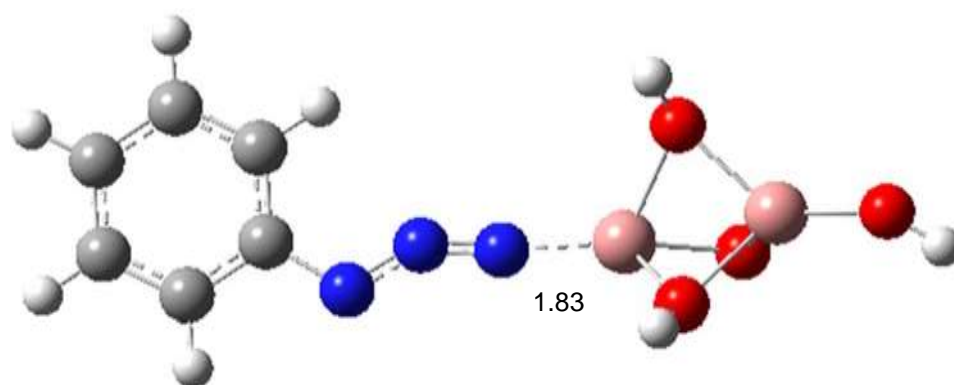

**1c-Fe<sub>2</sub>(OH)<sub>4</sub>**

| Center Number | Atomic Number | Atomic Type | Coordinates (Angstroms) |           |           |
|---------------|---------------|-------------|-------------------------|-----------|-----------|
|               |               |             | X                       | Y         | Z         |
| 1             | 7             | 0           | 0.455562                | -0.395643 | 0.192934  |
| 2             | 7             | 0           | 1.663510                | -0.357145 | 0.108726  |
| 3             | 7             | 0           | 2.737218                | -1.057868 | -0.013437 |
| 4             | 6             | 0           | 3.983251                | -0.366084 | -0.050068 |
| 5             | 6             | 0           | 4.140552                | 1.038749  | 0.038685  |
| 6             | 6             | 0           | 5.425217                | 1.599945  | -0.009535 |
| 7             | 6             | 0           | 6.562710                | 0.779515  | -0.145719 |
| 8             | 6             | 0           | 6.403215                | -0.617131 | -0.233664 |
| 9             | 6             | 0           | 5.123887                | -1.191009 | -0.186660 |
| 10            | 1             | 0           | 3.264189                | 1.678741  | 0.144395  |
| 11            | 1             | 0           | 5.539857                | 2.682701  | 0.059394  |
| 12            | 1             | 0           | 7.558003                | 1.222977  | -0.182741 |
| 13            | 1             | 0           | 7.276702                | -1.261527 | -0.338833 |
| 14            | 1             | 0           | 4.987997                | -2.269873 | -0.253123 |
| 15            | 26            | 0           | -1.358046               | -0.224541 | 0.413295  |
| 16            | 8             | 0           | -2.243865               | 1.504104  | -0.295490 |
| 17            | 1             | 0           | -1.946642               | 2.176238  | -0.933252 |
| 18            | 8             | 0           | -2.943696               | -0.275090 | 1.579708  |
| 19            | 1             | 0           | -3.100853               | 0.207649  | 2.411207  |
| 20            | 8             | 0           | -2.501482               | -1.194598 | -0.892696 |
| 21            | 1             | 0           | -2.326830               | -1.595865 | -1.760697 |
| 22            | 26            | 0           | -3.759914               | 0.230573  | -0.222027 |
| 23            | 8             | 0           | -5.519350               | 0.270780  | -0.650683 |
| 24            | 1             | 0           | -6.345347               | -0.228762 | -0.541825 |

Geometrical parameters and structure of the regioisomeric transition states of the **1c**-Fe(OH)<sub>3</sub>+**2** reaction leading the **4** and **5** cycloadducts (OPBE/LANL2/LANLDZ)

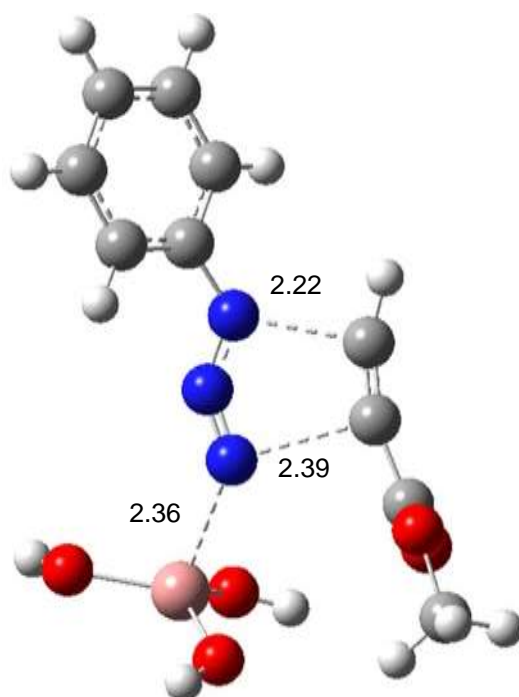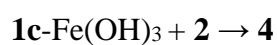

| Center Number | Atomic Number | Atomic Type | Coordinates (Angstroms) |           |           |
|---------------|---------------|-------------|-------------------------|-----------|-----------|
|               |               |             | X                       | Y         | Z         |
| 1             | 6             | 0           | -0.749241               | 2.325395  | -0.624066 |
| 2             | 6             | 0           | 0.453629                | 2.094545  | -0.364560 |
| 3             | 7             | 0           | 0.371965                | -0.242209 | 0.113304  |
| 4             | 7             | 0           | -0.809477               | -0.306800 | -0.073952 |
| 5             | 7             | 0           | -1.797207               | 0.377592  | -0.474584 |
| 6             | 6             | 0           | -3.151050               | 0.112816  | -0.126827 |
| 7             | 6             | 0           | -3.521182               | -0.696603 | 0.972491  |
| 8             | 6             | 0           | -4.880918               | -0.879909 | 1.263742  |
| 9             | 6             | 0           | -5.872615               | -0.252519 | 0.484619  |
| 10            | 6             | 0           | -5.495246               | 0.554220  | -0.605396 |

|    |    |   |           |           |           |
|----|----|---|-----------|-----------|-----------|
| 11 | 6  | 0 | -4.139551 | 0.734337  | -0.920223 |
| 12 | 1  | 0 | -1.652044 | 2.847451  | -0.880234 |
| 13 | 1  | 0 | -2.756481 | -1.181849 | 1.578790  |
| 14 | 1  | 0 | -5.165776 | -1.512295 | 2.105070  |
| 15 | 1  | 0 | -6.926805 | -0.396366 | 0.721260  |
| 16 | 1  | 0 | -6.256605 | 1.034748  | -1.220045 |
| 17 | 1  | 0 | -3.842877 | 1.333164  | -1.780267 |
| 18 | 6  | 0 | 1.894262  | 2.226024  | -0.227742 |
| 19 | 8  | 0 | 2.711502  | 2.080409  | -1.159972 |
| 20 | 8  | 0 | 2.226975  | 2.541240  | 1.074236  |
| 21 | 6  | 0 | 3.669938  | 2.607633  | 1.376556  |
| 22 | 1  | 0 | 4.113220  | 1.612381  | 1.256370  |
| 23 | 1  | 0 | 4.169118  | 3.329098  | 0.717074  |
| 24 | 1  | 0 | 3.714486  | 2.934172  | 2.419556  |
| 25 | 26 | 0 | 2.173185  | -1.751709 | -0.141600 |
| 26 | 8  | 0 | 1.308313  | -3.349804 | 0.134659  |
| 27 | 8  | 0 | 2.579240  | -1.325880 | -1.871720 |
| 28 | 8  | 0 | 3.292204  | -1.193759 | 1.213805  |
| 29 | 1  | 0 | 1.025622  | -3.992750 | -0.544494 |
| 30 | 1  | 0 | 3.112111  | -0.580500 | -2.211042 |
| 31 | 1  | 0 | 3.412211  | -1.656184 | 2.066558  |

---

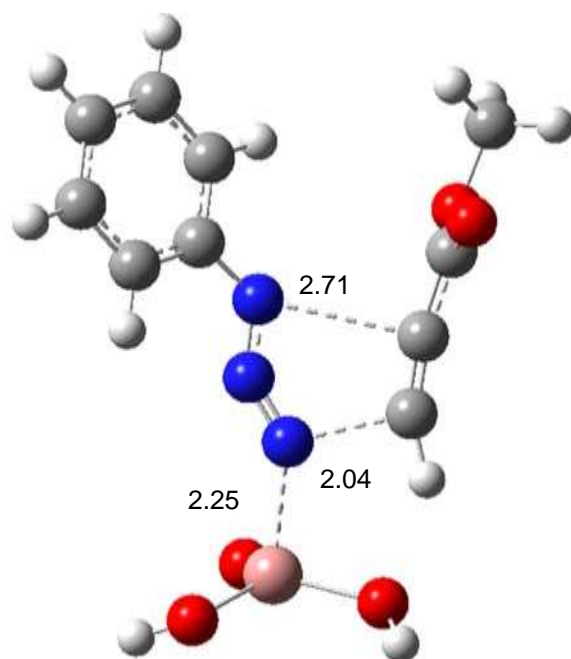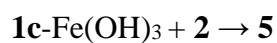

| Center Number | Atomic Number | Atomic Type | Coordinates (Angstroms) |           |           |
|---------------|---------------|-------------|-------------------------|-----------|-----------|
|               |               |             | X                       | Y         | Z         |
| 1             | 6             | 0           | 0.351317                | -2.029017 | 0.446880  |
| 2             | 6             | 0           | -0.882482               | -1.805393 | 0.549512  |
| 3             | 7             | 0           | -1.319792               | 0.107589  | 0.163308  |
| 4             | 7             | 0           | -0.284871               | 0.685800  | -0.099097 |
| 5             | 7             | 0           | 0.938312                | 0.421265  | -0.280986 |
| 6             | 6             | 0           | 1.989555                | 1.362930  | -0.148280 |
| 7             | 6             | 0           | 1.863291                | 2.571954  | 0.577698  |
| 8             | 6             | 0           | 2.968401                | 3.428210  | 0.682520  |
| 9             | 6             | 0           | 4.199487                | 3.086642  | 0.088119  |
| 10            | 6             | 0           | 4.318406                | 1.879117  | -0.626193 |
| 11            | 6             | 0           | 3.218915                | 1.017446  | -0.751907 |
| 12            | 1             | 0           | -1.931149               | -2.045968 | 0.719819  |
| 13            | 1             | 0           | 0.912884                | 2.835262  | 1.041690  |
| 14            | 1             | 0           | 2.869314                | 4.363477  | 1.234312  |
| 15            | 1             | 0           | 5.054893                | 3.756072  | 0.179690  |
| 16            | 1             | 0           | 5.266577                | 1.611561  | -1.092937 |
| 17            | 1             | 0           | 3.291892                | 0.088972  | -1.315146 |
| 18            | 6             | 0           | 1.695365                | -2.548584 | 0.530875  |
| 19            | 8             | 0           | 2.338658                | -2.688996 | 1.593230  |
| 20            | 8             | 0           | 2.173503                | -2.913011 | -0.722470 |
| 21            | 6             | 0           | 3.506299                | -3.537819 | -0.738292 |
| 22            | 1             | 0           | 4.255225                | -2.868640 | -0.294753 |
| 23            | 1             | 0           | 3.491867                | -4.482366 | -0.178825 |



|    |    |   |           |           |           |
|----|----|---|-----------|-----------|-----------|
| 24 | 1  | 0 | 3.714677  | -3.716617 | -1.797197 |
| 25 | 26 | 0 | -3.526286 | 0.310368  | -0.126946 |
| 26 | 8  | 0 | -3.738951 | 0.381864  | -1.945018 |
| 27 | 8  | 0 | -3.911760 | -1.307390 | 0.708800  |
| 28 | 8  | 0 | -4.015482 | 1.827068  | 0.777821  |
| 29 | 1  | 0 | -3.955523 | -0.325361 | -2.582149 |
| 30 | 1  | 0 | -4.422330 | -1.406759 | 1.535922  |
| 31 | 1  | 0 | -4.339509 | 2.669023  | 0.403105  |

---

Geometrical parameters and structure of the regioisomeric transition states of the **1c**-Fe<sub>2</sub>(OH)<sub>4</sub> + **2** reaction leading the **4** and **5** cycloadducts (OPBE/LANL2/LANLDZ)

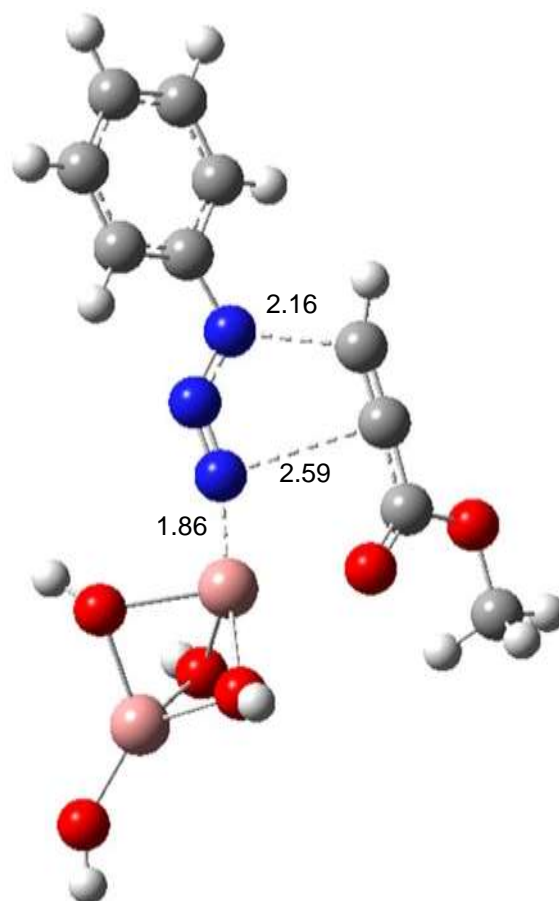

TS **1c**-Fe<sub>2</sub>(OH)<sub>4</sub> + **2** → **4**

| Center Number | Atomic Number | Atomic Type | Coordinates (Angstroms) |           |           |
|---------------|---------------|-------------|-------------------------|-----------|-----------|
|               |               |             | X                       | Y         | Z         |
| 1             | 6             | 0           | -2.333665               | 2.283858  | 0.252216  |
| 2             | 6             | 0           | -1.105160               | 2.505200  | 0.160102  |
| 3             | 7             | 0           | -0.466475               | 0.075864  | -0.327533 |
| 4             | 7             | 0           | -1.630125               | -0.317056 | -0.339442 |
| 5             | 7             | 0           | -2.771255               | 0.297500  | -0.465077 |
| 6             | 6             | 0           | -3.972948               | -0.421441 | -0.210230 |
| 7             | 6             | 0           | -4.026903               | -1.666036 | 0.463701  |
| 8             | 6             | 0           | -5.266676               | -2.279049 | 0.695963  |
| 9             | 6             | 0           | -6.462807               | -1.663287 | 0.276916  |
| 10            | 6             | 0           | -6.407057               | -0.424856 | -0.390302 |
| 11            | 6             | 0           | -5.172010               | 0.194026  | -0.639419 |
| 12            | 1             | 0           | -3.363244               | 2.456462  | 0.511625  |

|    |    |   |           |           |           |
|----|----|---|-----------|-----------|-----------|
| 13 | 1  | 0 | -3.103905 | -2.142064 | 0.793584  |
| 14 | 1  | 0 | -5.300425 | -3.240075 | 1.211159  |
| 15 | 1  | 0 | -7.423031 | -2.144289 | 0.464338  |
| 16 | 1  | 0 | -7.325625 | 0.056333  | -0.727969 |
| 17 | 1  | 0 | -5.123008 | 1.137269  | -1.182861 |
| 18 | 6  | 0 | 0.188717  | 3.091699  | -0.007182 |
| 19 | 8  | 0 | 0.429375  | 4.159415  | -0.607023 |
| 20 | 8  | 0 | 1.210906  | 2.324804  | 0.601813  |
| 21 | 6  | 0 | 2.538909  | 2.980978  | 0.652849  |
| 22 | 1  | 0 | 2.896632  | 3.185545  | -0.362336 |
| 23 | 1  | 0 | 2.459105  | 3.917302  | 1.218758  |
| 24 | 1  | 0 | 3.179969  | 2.254766  | 1.155664  |
| 25 | 26 | 0 | 1.327872  | -0.111799 | 0.139478  |
| 26 | 8  | 0 | 1.653653  | -2.217494 | 0.095905  |
| 27 | 8  | 0 | 2.909838  | -0.268213 | 1.388172  |
| 28 | 8  | 0 | 2.719076  | -0.035128 | -1.314723 |
| 29 | 1  | 0 | 1.143294  | -2.894450 | -0.384352 |
| 30 | 1  | 0 | 2.842803  | -0.619989 | 2.295968  |
| 31 | 1  | 0 | 2.600942  | -0.017825 | -2.280896 |
| 32 | 26 | 0 | 3.464190  | -1.493043 | -0.129417 |
| 33 | 8  | 0 | 5.086959  | -2.236281 | -0.427277 |
| 34 | 1  | 0 | 6.037030  | -2.040629 | -0.472531 |

---

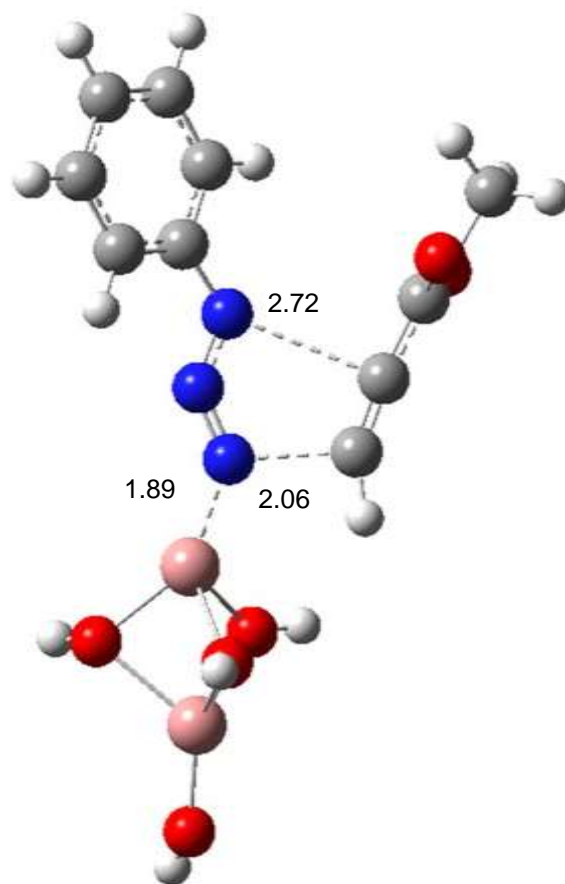

TS **1c**-Fe<sub>2</sub>(OH)<sub>4</sub> + **2** → **5**

| Center Number | Atomic Number | Atomic Type | Coordinates (Angstroms) |           |           |
|---------------|---------------|-------------|-------------------------|-----------|-----------|
|               |               |             | X                       | Y         | Z         |
| 1             | 6             | 0           | -1.456304               | 2.054431  | 0.611269  |
| 2             | 6             | 0           | -0.254576               | 1.745232  | 0.789500  |
| 3             | 7             | 0           | 0.181735                | -0.171406 | 0.179919  |
| 4             | 7             | 0           | -0.882962               | -0.788588 | -0.022975 |
| 5             | 7             | 0           | -2.071004               | -0.413963 | -0.358419 |
| 6             | 6             | 0           | -3.142244               | -1.338602 | -0.207627 |
| 7             | 6             | 0           | -3.069827               | -2.540309 | 0.539456  |
| 8             | 6             | 0           | -4.197628               | -3.367346 | 0.636061  |
| 9             | 6             | 0           | -5.405817               | -3.009698 | 0.004383  |
| 10            | 6             | 0           | -5.476838               | -1.812147 | -0.733114 |
| 11            | 6             | 0           | -4.353525               | -0.979420 | -0.842633 |
| 12            | 1             | 0           | 0.741796                | 1.950662  | 1.143501  |
| 13            | 1             | 0           | -2.138107               | -2.814954 | 1.033483  |
| 14            | 1             | 0           | -4.136872               | -4.292519 | 1.210902  |
| 15            | 1             | 0           | -6.279971               | -3.655948 | 0.088450  |
| 16            | 1             | 0           | -6.407545               | -1.528181 | -1.225374 |
| 17            | 1             | 0           | -4.392130               | -0.055429 | -1.417636 |
| 18            | 6             | 0           | -2.808533               | 2.528863  | 0.560316  |
| 19            | 8             | 0           | -3.634439               | 2.464502  | 1.499098  |
| 20            | 8             | 0           | -3.086283               | 3.116512  | -0.675572 |
| 21            | 6             | 0           | -4.429899               | 3.696375  | -0.810925 |
| 22            | 1             | 0           | -5.203059               | 2.939814  | -0.622472 |

|    |    |   |           |           |           |
|----|----|---|-----------|-----------|-----------|
| 23 | 1  | 0 | -4.563745 | 4.527201  | -0.105061 |
| 24 | 1  | 0 | -4.474584 | 4.054345  | -1.844074 |
| 25 | 26 | 0 | 2.030351  | -0.468461 | -0.105799 |
| 26 | 8  | 0 | 3.476443  | -1.702356 | -0.599510 |
| 27 | 8  | 0 | 3.125928  | 0.922662  | -1.043375 |
| 28 | 8  | 0 | 3.262299  | -0.027930 | 1.492734  |
| 29 | 1  | 0 | 3.638199  | -2.159666 | -1.445789 |
| 30 | 1  | 0 | 2.994246  | 1.811179  | -1.414989 |
| 31 | 1  | 0 | 3.269050  | -0.356845 | 2.407648  |
| 32 | 26 | 0 | 4.551447  | -0.011816 | 0.020759  |
| 33 | 8  | 0 | 6.327434  | 0.184788  | -0.242962 |
| 34 | 1  | 0 | 7.031702  | 0.155540  | -0.910636 |

---
